# Aerodigestive sampling reveals altered microbial exchange between lung, oropharyngeal, and gastric microbiomes in children with impaired swallow function

Claire Duvallet<sup>1,2</sup>, Kara Larson<sup>3</sup>, Scott Snapper<sup>4</sup>, Sonia Iosim<sup>3</sup>, Ann Lee<sup>4</sup>, Katherine Freer<sup>4</sup>, Kara May<sup>5</sup>, Eric Alm<sup>1,2</sup>, and Rachel Rosen<sup>3,\*</sup>

<sup>1</sup>Department of Biological Engineering, MIT, Cambridge, Massachusetts

<sup>2</sup>Center for Microbiome Informatics and Therapeutics, MIT, Cambridge, Massachusetts

<sup>3</sup>Aerodigestive Center, Division of Gastroenterology, Hepatology and Nutrition, Boston Children's Hospital, Boston, Massachusetts

<sup>4</sup>Division of Gastroenterology, Hepatology and Nutrition, Boston Children's Hospital, Boston, Massachusetts

<sup>5</sup>Division of Pulmonary Medicine, Boston Children's Hospital, Boston, Massachusetts

\*Corresponding author

## 1 Abstract

### 2 1.1 Background

3 Children with oropharyngeal dysphagia have impaired airway protection mechanisms and are at  
4 higher risk for pneumonia and other pulmonary complications. Aspiration of gastric contents is  
5 often implicated as a cause for these pulmonary complications, despite being supported by little  
6 evidence. The goal of this study is to determine the relative contribution of oropharyngeal and  
7 gastric microbial communities to perturbations in the lung microbiome of children with and without  
8 oropharyngeal dysphagia and aspiration.

### 9 1.2 Methods

10 We conducted a prospective cohort study of 222 patients consecutively recruited from a tertiary  
11 aerodigestive center undergoing simultaneous esophagogastroduodenoscopy and flexible bronchoscopy.  
12 Bronchoalveolar lavage, gastric and oropharyngeal samples were collected and 16S sequencing was  
13 performed. A subset of patients also underwent video fluoroscopic swallow studies to assess swallow

14 function and were categorized as aspiration/no aspiration. Microbial communities across the aerodi-  
15 gestive tract were compared in patients with and without aspiration by calculating within-patient  
16 beta diversities and quantifying microbial exchange across sites.

### 17 **1.3 Results**

18 Within all patients, lung, oropharyngeal and gastric microbiomes overlap. The degree of similarity  
19 is the lowest between the oropharynx and lungs (median Jensen-Shannon distance (JSD) = 0.90),  
20 and as high between the stomach and lungs as between the oropharynx and stomach (median JSD  
21 = 0.55 and 0.56, respectively;  $p = 0.6$ ). Unlike the oropharyngeal microbiome, lung and gastric  
22 communities are highly variable across people and driven primarily by person rather than body site.  
23 In patients with aspiration, the lung microbiome more closely resembles oropharyngeal rather than  
24 gastric communities and there is greater prevalence of microbial exchange between the lung and  
25 oropharynx than between gastric and lung sites ( $p = 0.04$  and  $3 \times 10^{-5}$ , respectively).

### 26 **1.4 Conclusions**

27 The gastric and lung microbiomes display significant overlap in patients with intact airway protec-  
28 tive mechanisms while the lung and oropharynx remain distinct. In patients with impaired swal-  
29 low function and aspiration, the lung microbiome shifts towards oropharyngeal rather than gastric  
30 communities. This finding may explain why antireflux surgeries fail to show benefit in pediatric  
31 pulmonary outcomes.

### 32 **1.5 Key words**

33 Aerodigestive microbiomes; respiratory, oral, and gastric microbiomes; gastroesophageal reflux;  
34 impedance; aspiration; video fluoroscopic swallow study

## 35 **2 Introduction**

36 The economic and social impact of oropharyngeal dysfunction and aspiration is well known in the  
37 adult stroke population; adults with oropharyngeal dysfunction are at greater risk of pneumonia  
38 than those without [1]. Little is known about aspiration-related lung disease in children, though  
39 recent studies suggest that up to 10% of all pneumonia hospitalizations in pediatrics are related  
40 to aspiration [2]. Clinicians often assume these pneumonias result from the aspiration of refluxed  
41 gastric contents and frequently treat these children with antireflux surgery, fundoplication. Despite  
42 this common surgical practice, there are no pediatric studies which conclusively show improved pul-  
43 monary outcomes after fundoplication, suggesting that the respiratory symptoms seen in aspirating  
44 patients may not be related to aspiration of gastric contents [3, 4, 5, 6, 7]. An alternative hypothesis  
45 is that aspiration-related respiratory symptoms may result from aspirated oropharyngeal contents.  
46 To test this hypothesis, we determined the microbial signatures of the lungs, stomach, and orophar-  
47 ynx in children with and without oropharyngeal dysphagia (i.e. with and without impaired airway

48 protective mechanisms) to determine the relative contributions of the oropharyngeal and gastric  
49 microbiomes to the lung microbiome.

50 Previous studies have shown that the mouth, upper respiratory tract, and lung microbiota con-  
51 tain similar microbes, and that upstream oral communities seed downstream sites (e.g. lungs and  
52 stomach) [8, 9, 10]. However, there is little consensus on whether there exists a distinct or "core"  
53 lung microbiome that is consistent across people [9, 11, 12, 13]. Most studies, however, agree that the  
54 lung microbial communities share taxa with the oral microbiome, but that there are some bacteria  
55 present in lung communities whose abundances cannot be traced solely to the mouth [9, 8, 14, 12].

56 While the importance of oropharyngeal flora in seeding the lungs has been heavily studied in ICU  
57 settings [15, 16, 17], the role of oropharyngeal-lung flora exchange in otherwise healthy children with  
58 isolated swallowing dysfunction is unknown. Furthermore, studies investigating the relationships  
59 between microbial communities across the aerodigestive tract have not examined how microbes  
60 exchange between the stomach and lungs, and how this exchange relates to clinical factors such as  
61 aspiration and gastroesophageal reflux.

62 If the lung microbiome of aspirating patients exhibits more exchange with the oropharynx than  
63 the stomach, this could provide evidence for why anti-reflux surgery is not helpful in patients with  
64 aspiration-related respiratory symptoms. Furthermore, a shift in the lung microbial communities  
65 toward an oropharyngeal population could not only result in overt pneumonia but may also have more  
66 subtle, pro-inflammatory effects [18]. Finally, if there is a unique aerodigestive microbial signature  
67 in aspirating patients, microbial profiling may be helpful as a diagnostic tool for oropharyngeal  
68 dysphagia.

## 69 **3 Methods**

### 70 **3.1 Patient cohort and sample collection**

71 We conducted a prospective cross sectional cohort study of children ages 1–18 undergoing bron-  
72 choscopy and esophagogastroduodenoscopy (EGD) for the evaluation of chronic cough. Patients  
73 with gastrostomy or nasogastric tubes, a history of gastrointestinal surgery, or antibiotics within  
74 4 weeks of sample acquisition were excluded. The study was approved by the Boston Children's  
75 Hospital Institutional Review Board and informed consent was obtained from all patients/parents.

76 We first performed brushing of the posterior tongue to obtain oropharyngeal samples, placing  
77 the brush in TE buffer at -80C. Second, the bronchoscopy and bronchoalveolar lavage (BAL) was  
78 performed through an endotracheal tube in distal airways of the right middle lung or the most  
79 visually inflamed lung. Finally, gastric sampling was performed during the EGD. The endoscope was  
80 advanced, without suctioning, immediately into the stomach where the gastric fluid was suctioned  
81 into a sterile leukitrap. A minimum of 1 cc of gastric and lung fluid were collected and transferred  
82 to -80C. Each patient had a triad of samples collected: oropharynx, gastric fluid, and BAL (Tables  
83 1 and 2) [10].

## 84 3.2 Multichannel intraluminal impedance with pH (pH-MII)

85 A subset of patients had pH-MII testing at the discretion of the patient's primary gastroenterolo-  
86 gist. Acid reflux episodes were defined as episodes detected by the impedance (MII) sensors with  
87 associated drop in pH to  $< 4$ ; non-acid episodes did not have the associated drop. The percentage  
88 of time that reflux was in the proximal/distal esophagus was calculated by dividing the sum of the  
89 bolus clearance times in the proximal/distal esophagus by the total study duration. The percentage  
90 of full column reflux events was defined as the percentage of the total reflux events that reached the  
91 proximal two impedance sensors (i.e., the proximal most impedance channel) [19].

## 92 3.3 Oropharyngeal dysphagia assessment

93 A subset of the patients included in this study had a videofluoroscopic swallow study (VFSS) to  
94 assess swallow function and were divided into two groups (normal swallow function and aspira-  
95 tion/penetration). Because patients with penetration on VFSS have similar pulmonary symptoms  
96 and respond similarly to thickening as patients that aspirate, we included patients with aspiration  
97 and penetration in one group.

## 98 3.4 Sample processing and sequencing

99 Oropharyngeal swabs, BAL, and gastric fluid samples suspended in Tris-Saline buffer were cen-  
100 trifuged for 3 minutes at 10,000 rcf prior to DNA isolation. DNA was extracted from the sample  
101 pellet with the Qiagen DNeasy PowerSoil Kit as described by the manufacturer, with the following  
102 modifications: protein precipitation in one step using 100  $\mu\text{L}$  of each C2 and C3 solutions, and  
103 column centrifugation at 10,000 rcf for 10 minutes. Sequencing was performed in two batches at the  
104 Broad Institute. Patients with multiple samples had all of their respective samples sequenced in the  
105 same batch.

## 106 3.5 Microbiome data processing and analysis

107 Paired end reads were merged using USEARCH `-fastq_mergepairs` and truncated to 200 bp.  
108 Reads with more than 2 expected errors were discarded. Operational taxonomic units (OTUs) were  
109 clustered at 99% similarity and assigned taxonomy using the RDP classifier ( $c = 0.5$ ) [20]. All  
110 quality filtering and OTU calling steps were performed with an in-house pipeline  
111 ([https://github.com/thomasgurry/amplicon\\_sequencing\\_pipeline](https://github.com/thomasgurry/amplicon_sequencing_pipeline)).

112 Beta diversity was calculated with the Jensen-Shannon distance (JSD). Only samples which were  
113 sequenced in the same batch were considered in cross-patient comparisons. Differences in overall  
114 community structure across sites was assessed using the PERMANOVA test as implemented in  
115 `scikit-bio v 0.4.2 (skbio.stats.distance.permanova)`.

116 To define exchanged OTUs, we used data from patients with all three sites sequenced. For  
117 each OTU, we calculated the Spearman partial correlation ( $\frac{r_{xy} - r_{xz}r_{zy}}{\sqrt{(1-r_{xz}^2)(1-r_{zy}^2)}}$ ) between its non-zero  
118 abundances in two sites, partialled on the third site (Scipy v 0.19.0 `stats.spearmanr`). P-values  
119 for each OTU were calculated as the percentage of null correlations larger than the observed cor-  
120 relation after shuffling abundances 2000 times. Only OTUs present in two sites in at least 10

121 patients were considered. OTUs with FDR-corrected q-value  $< 0.1$  were defined as “exchanged”  
122 (`sandbox.stats.multicomp.multipletests` with `method='fdr_bh'`). To determine the statistical  
123 significance of the number of exchanged OTUs, we shuffled the patient IDs for each OTU in each  
124 site and re-defined “null” exchanged OTUs as described above.

125 We used five-fold cross-validation and Random Forest classifiers (`scikit-learn` v 0.18.1  
126 `ensemble.RandomForestClassifier` with `n_estimators=1000`) for all supervised machine learning  
127 analyses. Areas under the ROC curve (AUCs) were calculated based on the predictions on each  
128 fold’s test set (mean values across folds is reported) and Fisher p-values were calculated from all  
129 test set predictions. The aspiration/non-aspiration classifiers varied different train/test splits, so we  
130 report the mean results across 100 repetitions.

### 131 3.6 Availability of data and materials

132 Code to reproduce the analyses presented here are available at [www.github.com/cduvallet/aspiration-](http://www.github.com/cduvallet/aspiration-analysis-public)  
133 `analysis-public`. The 16S sequencing data used in this study are available in the SRA repository at  
134 accession number SRP141148 and clinical metadata are available upon request from the correspond-  
135 ing author.

## 136 4 Results

137 Two hundred and twenty two patients were included in the analysis (Tables 1 and 2). The mean  
138 age of the patients was  $7.1 \pm 5.4$  years. One hundred out of 222 patients were taking proton pump  
139 inhibitors at the time of sampling. One hundred and four patients had a videofluoroscopic swallow  
140 study of which 47 (45%) had evidence of aspiration or penetration and 57 (55%) had normal swallow  
141 function. Thirty one patients had pH-MII testing for gastroesophageal reflux at the time of sample  
142 collection.

### 143 4.1 Aerodigestive microbiome across people

144 At the genus level, pediatric aerodigestive communities share many predominant members, including  
145 *Streptococcus*, *Prevotella*, *Haemophilus*, *Veillonella*, and *Neisseria* (Figure 1). Despite genus-level  
146 similarities, OTU-level aerodigestive communities are distinct and highly variable across people.  
147 The overall community composition was significantly different between sites (PERMANOVA on  
148 JSD,  $p < 0.001$ , Figure 2B). Furthermore, lung communities were very different across people (me-  
149 dian lung-lung JSD = 0.88) while oropharyngeal communities tended to be more similar (median  
150 oropharyngeal-oropharyngeal JSD = 0.59, Figure 2A).

### 151 4.2 Aerodigestive microbiome within people

152 We compared aerodigestive communities within patients who had multiple sites sequenced (Table 2,  
153 Figure 3). Oropharyngeal and gastric fluid communities are similar within patients (median JSD =  
154 0.56), reflecting that the mouth seeds the gastric microbiome [8, 9]. The majority of patients had  
155 very different lung and oropharyngeal communities (median JSD = 0.90), and these differences were

156 significantly higher than either the lung-gastric fluid or gastric fluid-oropharyngeal beta diversities  
157 ( $p < 1 \times 10^{-8}$ , Figure 3A). Surprisingly, lung and stomach communities were as similar to each  
158 other as stomach and oropharyngeal communities (median JSD = 0.55 versus median JSD = 0.56,  
159 respectively,  $p = 0.6$ ).

160 To identify specific microbes exchanging between sites, we reasoned that an actively exchanging  
161 microbe's abundances in two sites should be correlated across patients (Supplementary Figure 6  
162 and Methods). We identified 12 OTUs exchanged between lung and oropharyngeal, 74 between  
163 gastric fluid and lung, and 118 between oropharyngeal and gastric fluid communities. These results  
164 were statistically significant: we found a maximum of 2 exchanged OTUs between sites in our null  
165 analysis. The low number of directly exchanged OTUs between the oropharynx and lungs supports  
166 the finding that these sites are more distinct than others in the aerodigestive tract. The lungs and  
167 stomach exchange fewer OTUs than the oropharynx and stomach even though they have comparable  
168 intra-patient similarities, suggesting that factors other than specific bacterial exchange contributes  
169 to the similarity between lungs and stomachs within patients.

170 Random Forest classifiers trained to distinguish between sites (ensuring that samples from the  
171 same patient were in the same train/test set) were able to identify a generalizable oropharyngeal  
172 microbial signature that distinguishes the oropharynx from other sites across people (AUC = 0.95  
173 for both gastric fluid and lung comparisons, Figure 3B). Surprisingly, when we compared within-  
174 patient similarities across sites to across-patient similarities for the same sites, we found that lung  
175 and stomach communities within patients were more similar than lungs across patients and than  
176 stomachs across patients (Table 3,  $p < 1 \times 10^{-8}$ ). Thus, while there exists a "core" oropharyngeal  
177 microbiome across people, lung and gastric communities are more variable and driven primarily by  
178 the person rather than body site. These results challenge the prevailing hypothesis that human-  
179 associated microbial communities are primarily driven by body habitat and instead suggest that  
180 patient-specific relationships may be equally, if not more, important in determining community  
181 structure in the aerodigestive microbiome [21, 22, 23].

### 182 4.3 Aspiration modulates the relationship between lung and oropharyn- 183 geal microbiomes but not the lung and stomach

184 Next, we investigated the impact of oropharyngeal dysphagia and aspiration on the relationships  
185 between aerodigestive microbiomes. Aspirators had significantly more similar lung and oropharyn-  
186 geal communities than non-aspirators (Figure 4A,  $p = 0.04$ ) and were much more likely to have the  
187 pre-defined oropharyngeal-lung microbes in both their oropharynx and lungs than non-aspirators  
188 ( $p = 2 \times 10^{-5}$ ) (Figure 4B). Lung-oropharynx exchanged OTUs co-occurred in a median of 42% of  
189 aspirators' lung and oropharyngeal communities but only 20% of non-aspirators'. Aspirators were  
190 not more likely to have stomach-lung microbes present in both the lungs and gastric fluid than  
191 non-aspirators (Figure 4B,  $p > 0.5$ ), and lung and gastric communities of aspirating patients were  
192 not necessarily more similar to each other than those of non-aspirating patients (Figure 4A,  $p =$   
193 0.5).

194 To identify potential microbial biomarkers of aspiration, we looked at the exchanged OTUs which  
195 were most frequently present in the lung and oropharyngeal communities of aspirators relative to

196 non-aspirators. In the oropharyngeal-lung exchanged OTUs, these were an unknown OTU in the  
197 *Flavobacteriaceae* family, OTUs in the *Fusobacterium*, *Rothia*, *Veillonella* genera, and an unknown  
198 OTU in the *Prevotellaceae* family, among others (Table 4, gastric-lung OTUs in Supplementary  
199 Table 8).

200 We used Random Forest classifiers trained on the presence of exchanged OTUs in different sites  
201 to test their potential as biomarkers. The concordant presence or absence of exchanged OTUs in the  
202 two sites improved classifiers based on the oropharyngeal-lung OTUs but not the ones based on the  
203 lung-gastric OTUs, relative to classifiers based on the presence of the exchanged OTUs in either site  
204 alone (Table 5). Using Random Forest classifiers trained on the entire microbiomes, we found that  
205 combining the oropharynx and lung communities resulted in a better classifier than either community  
206 alone (Table 6). Surprisingly, the classifiers trained on oropharyngeal and gastric communities  
207 performed well, despite our expectation that aspiration-induced changes in the microbiome would  
208 manifest in the lungs rather than the oropharynx or stomach. We confirmed that the patients’  
209 aspiration status was not confounded with proton pump inhibitor usage (Fisher exact p-value >  
210 0.2), but there may be other co-morbidities or unmeasured confounders that could be driving the  
211 differences detected in these communities. However, taken together, these results suggest that  
212 identifying a biomarker for aspiration based on bacteria in both the lungs and oropharynx may be  
213 possible, and that these two sites together contain more information about a patients aspiration  
214 status than either site alone.

#### 215 4.4 Reflux may impact the relationship between lung and stomach mi- 216 crobiomes

217 Reflux profiles for the 31 patients are shown in Table 7. The percent of full column, distal, and  
218 proximal reflux were slightly negatively correlated with gastric-lung JSD, indicating that patients  
219 with more frequent reflux may have more similar gastric and lung microbial communities (Figure  
220 5). However, the large range of gastric-lung JSDs across all patients and relatively weak correlation  
221 suggests that other non-reflux factors likely contribute more to the similarities between gastric and  
222 lung communities that are observed across all people.

## 223 5 Discussion

224 In this study, we characterized the relationships between the oropharyngeal, lung, and gastric mi-  
225 crobiomes in a large pediatric cohort with and without swallowing dysfunction. Leveraging our  
226 simultaneous sampling of multiple sites per patient, we find that there exists a “core” oropharyn-  
227 geal microbiome across patients, that the lung and gastric communities are highly variable across  
228 patients and driven primarily by patient rather than body site, and that within patients the lung  
229 and oropharyngeal communities remain most distinct. We show for the first time that in patients  
230 with impaired swallowing, the lung microbiome shifts toward oropharyngeal flora rather than gastric  
231 flora. Our results also suggest that identifying biomarkers for aspiration based on the presence of  
232 certain bacteria in both the lungs and oropharynx may ultimately be possible.

233 There are several limitations to our study. First, because it is unethical to perform bronchoscopies

234 on healthy children, our patients in this study had respiratory symptoms. However, we believe  
235 that our patient population represents patients typically seen in aerodigestive centers and that  
236 understanding the degree of microbial exchange is most clinically relevant in patients with symptoms.  
237 The microbial populations we found in this study are similar to those of previously published studies  
238 of both healthy and symptomatic adults which reinforces the validity of our results [8, 9, 13, 14].  
239 Second, the number of patients undergoing pH-MII testing was relatively small which limits our  
240 conclusions about the impact of gastroesophageal reflux on the lung. However, our study raises  
241 enough concerns about the significance of oropharyngeal-lung exchange in children with impaired  
242 swallowing that gastroesophageal reflux should not be considered as the primary source of microbial  
243 exchange causing pulmonary symptoms. Third, the diagnosis of oropharyngeal dysphagia in this  
244 study was based on VFSS. While this only categorizes patients based on a one-point-in-time study,  
245 it is the gold standard test to diagnose oropharyngeal dysphagia in children and therefore we feel it  
246 is appropriate for use in this study.

247 Despite these limitations, our findings have broad clinical implications for the understanding  
248 and treatment of oropharyngeal dysphagia with resultant aspiration. Our clinical finding that the  
249 lung microbiome in children with aspiration shifts toward the oropharynx rather than the stomach  
250 highlights the importance of understanding the primary driver of microbial exchange so that ther-  
251 apies can be tailored accordingly. For example, if the mechanism of lung symptoms and disease in  
252 aspirating children results from a microbial shift towards oropharyngeal flora, anti-reflux surgery  
253 will be of no benefit to preventing oropharyngeal-lung exchange. Instead, therapies may need to be  
254 tailored to focused on changing oropharyngeal flora or salivary properties.

255 While there are no existing pediatric microbiome studies of the aerodigestive microbiome in pa-  
256 tients with dysphagia, there is evidence that children with oropharyngeal dysphagia are predisposed  
257 to pneumonia and that this could be due to increased aspiration of microbes from the oral micro-  
258 biome. In a study of 382 children undergoing VFSS, evidence of aspiration predicted pneumonia  
259 risk, though the causative organisms for these pneumonias were not known [24]. In cohort of elderly  
260 aspirating patients, oral colonization by respiratory pathogens was associated with increased risk  
261 of pneumonia, highlighting the potential importance of oral flora in influencing the lung outcomes  
262 [25]. Finally, a previous study of healthy adults found that individuals with oropharyngeal bacteria  
263 in their lungs had increased evidence of inflammatory metabolomic signals, suggesting that even a  
264 change of lung flora to commensal oropharyngeal bacteria can trigger inflammation even in healthy  
265 patients [18]. Our results add to these findings and suggest that changes in the lung microbiome  
266 towards oropharyngeal flora merit additional study to determine if these shifts result in increased  
267 morbidity or worse clinical outcomes, including the development of pneumonia.

268 From a microbial perspective, we identified bacterial families and genera that are more commonly  
269 exchanged between the oropharynx and lungs of children that aspirate than of children with intact  
270 swallowing mechanism. While there are no other 16S sequencing studies determining aspiration  
271 pneumonia risk in children, there is evidence from the adult literature that similar bacteria are  
272 involved in aspiration pneumonia risk. For example, oropharyngeal *Streptococci* were found to be  
273 more abundant in the lungs of adults with pneumonia and aspiration risk factors than without  
274 aspiration risk [26]. In a study of 173 adults in long term care facilities, patients with oropharyngeal  
275 *Prevotella* and *Veillonella* had increased risk of death from pneumonia compared to patients who had



276 oropharyngeal *Neisseria* and *Fusobacterium* [27]. Our study is a critical first step toward identifying  
277 bacteria present in the oropharynx and lungs of aspirating children that may result in higher risk  
278 for pneumonias, with additional studies needed to determine their impact on pediatric outcomes.

279 In summary, our findings suggest that interventions to reduce aspiration-related respiratory com-  
280 plications due to increased microbial exchange should target aspiration from the oropharynx rather  
281 than the stomach. This microbial data supports the clinical observation that antireflux surgery  
282 fails to prevent pulmonary complications such as pneumonias or hospitalizations [3, 4, 5, 6, 7]. By  
283 simultaneously sampling multiple sites per patient, we show that the lung and stomach microbiomes  
284 are highly variable across patients and determined primarily by patient rather than body site. Un-  
285 derstanding the relationships between aerodigestive communities in aspirating and non-aspirating  
286 patients provides insight into the potential pathophysiology behind aspiration-related respiratory  
287 outcomes and suggests potential diagnostics and therapeutics for future investigation.

## 288 6 Declarations

### 289 6.1 Acknowledgments

290 We thank Scott Olesen and Manu Kumar for helpful discussions on statistical analyses, and Nathaniel  
291 Chu and members of the Alm lab for helpful discussions on presenting and visualizing the results.

### 292 6.2 Funding

293 This work was supported by NIH R01 DK097112 (R.R.), the Boston Children’s Hospital Transla-  
294 tional Research Program (R.R.), and the North American Society for Pediatric Gastroenterology,  
295 Hepatology and Nutrition Grant for Diseases of the Upper Gastrointestinal Tract (R.R.). Com-  
296 putational resources for this work were supported by the Center for Microbiome Informatics and  
297 Therapeutics (E.A.). C.D. acknowledges support through the National Defense Science & Engineer-  
298 ing Graduate Fellowship (NDSEG).

### 299 6.3 Author contributions

300 R.R. designed the study, recruited patients, and performed the endoscopies. R.R. led patient re-  
301 cruitment. A.L. and S.I. assisted with patient recruitment. K.L. performed and interpreted the  
302 videofluoroscopic swallow studies. K.M. performed the bronchoscopies in this study. K.F. and S.S.  
303 performed the DNA isolation for 16S sequencing. C.D. processed and analyzed the microbiome data.  
304 C.D., E.A., and R.R. interpreted the results. C.D. and R.R. wrote the manuscript.

### 305 6.4 List of abbreviations

306 EGD: esophagogastroduodenoscopy

307 BAL: bronchoalveolar lavage

308 MII: multichannel intraluminal impedance

309 VFSS: videofluoroscopic swallow study

310 OTU: operational taxonomic unit  
311 JSD: Jensen-Shannon distance  
312 PERMANOVA: permutational multivariate analysis of variance  
313 AUC: area under the ROC (receiver operating characteristic) curve  
314

## <sup>315</sup> 7 Tables and Figures

### <sup>316</sup> 7.1 Tables

|                    | Normal | Aspirators | Not tested | Total |
|--------------------|--------|------------|------------|-------|
| BAL                | 33     | 33         | 36         | 102   |
| Oropharyngeal swab | 43     | 36         | 97         | 176   |
| Gastric fluid      | 48     | 41         | 58         | 147   |
| Stool              |        |            | 20         | 20    |

Table 1: Number of patient samples for each body site.

|                                      | Normal | Aspirators | Not tested | Total |
|--------------------------------------|--------|------------|------------|-------|
| BAL and oropharyngeal swab           | 23     | 25         | 25         | 73    |
| BAL and gastric fluid                | 28     | 29         | 32         | 89    |
| Gastric fluid and oropharyngeal swab | 35     | 32         | 45         | 112   |
| Stool and oropharyngeal swab         |        |            | 20         | 20    |

Table 2: Number of patients with multiple body sites sequenced.

|                           | Within people                     | Across people            | p                                             |
|---------------------------|-----------------------------------|--------------------------|-----------------------------------------------|
| Lung and oropharynx       | more different<br>not significant | oropharynx<br>lungs      | $< 1 \times 10^{-8}$<br>0.8                   |
| Lung and gastric fluid    | more similar<br>more similar      | lungs<br>gastric         | $< 1 \times 10^{-11}$<br>$< 1 \times 10^{-8}$ |
| Gastric and oropharyngeal | more similar<br>not significant   | gastric<br>oropharyngeal | $< 1 \times 10^{-11}$<br>0.07                 |

**Table 3: Lung and gastric microbial communities are driven primarily by person rather than body site.** For each patient and each aerodigestive site, we compared the average JSD between that patient’s site and all other patients’ communities of that same site with the JSD between that patient’s site and their other two aerodigestive sites. For example, the top row shows the comparisons between (1) the average JSD between a patient’s oropharyngeal community and all other oropharyngeal communities and (2) the JSD between that patient’s own oropharyngeal and lung communities. We subtracted each patient’s between-sites JSD from their average between-patient JSD and calculated Wilcoxon signed-rank p-values using Python’s `scipy.stats.wilcoxon` function.

| Family             | Genus           | Non-aspirator | Aspirator | Difference |
|--------------------|-----------------|---------------|-----------|------------|
| Flavobacteriaceae  |                 | 8.7           | 48.0      | 39.3       |
| Fusobacteriaceae   | Fusobacterium   | 30.4          | 68.0      | 37.6       |
| Micrococcaceae     | Rothia          | 8.7           | 44.0      | 35.3       |
| Veillonellaceae    | Veillonella     | 26.1          | 60.0      | 33.9       |
| Prevotellaceae     |                 | 43.5          | 76.0      | 32.5       |
| Porphyromonadaceae | Porphyromonas   | 39.1          | 68.0      | 28.9       |
| Streptococcaceae   | Streptococcus   | 13.0          | 40.0      | 27.0       |
| Veillonellaceae    | Centipeda       | 8.7           | 32.0      | 23.3       |
| Prevotellaceae     | Prevotella      | 17.4          | 36.0      | 18.6       |
| Leptotrichiaceae   | Streptobacillus | 21.7          | 40.0      | 18.3       |
| Fusobacteriaceae   | Fusobacterium   | 17.4          | 32.0      | 14.6       |
| Aerococcaceae      | Abiotrophia     | 21.7          | 28.0      | 6.3        |

Table 4: **Prevalence of lung-oropharynx exchanged OTUs.** Prevalence is calculated as the percentage of patients who have the OTU present in both their lungs and oropharynx, calculated separately among aspirators (N = 25) and non-aspirators (N = 23). OTUs are ordered by their differential prevalence in aspirators relative to non-aspirators, and are labeled with their family- and genus-level taxonomies. Blank genus names indicate OTUs which were not annotated at the genus level. A similar table for the lung-gastric exchange OTUs can be found in Supplementary Table 8.

| <b>Lung-oropharynx OTUs (12)</b> | AUC  | p    | N (non-asp/asp) |
|----------------------------------|------|------|-----------------|
| Lung                             | 0.63 | 0.29 | 33/33           |
| Oropharyngeal                    | 0.48 | 0.59 | 43/36           |
| Concordance                      | 0.66 | 0.19 | 23/25           |

  

| <b>Lung-gastric OTUs (74)</b> | AUC  | p    | N (non-asp/asp) |
|-------------------------------|------|------|-----------------|
| Lung                          | 0.63 | 0.19 | 33/33           |
| Gastric fluid                 | 0.66 | 0.04 | 48/41           |
| Concordance                   | 0.56 | 0.71 | 28/29           |

Table 5: **Classifiers based on the presence of exchanged OTUs.** (Top) Classifiers built from the presence of lung-oropharynx exchanged OTUs. (Bottom) Classifiers built from the presence of lung-gastric exchanged OTUs. Rows indicate which microbial community was used to train each classifier. In the “concordance” classifiers, OTUs which were either present or absent in both sites were coded as 1 and OTUs which were present in one site but absent in the other were coded as 0. AUCs are calculated as the area under the average ROC curve from five-fold cross validation. Fisher’s exact p values are calculated on the predictions on the hold-out data for all cross validation folds. Each classifier was built 100 times with random patient splits and classifier initializations, and mean values are reported here. Similar classifiers built from the abundance of exchanged OTUs are shown in Supplementary Table 9. AUCs and Fisher p-values from all 100 repetitions for all classifiers are shown in Supplementary Figures 7 and 8.)

| Sites                                | AUC  | Fisher p-value | N (non-asp/asp) |
|--------------------------------------|------|----------------|-----------------|
| Lung                                 | 0.66 | 0.2            | 33/33           |
| Oropharyngeal swab                   | 0.71 | 0.02           | 43/36           |
| Gastric fluid                        | 0.67 | 0.11           | 48/41           |
| Lung and oropharyngeal swab          | 0.81 | 0.01           | 23/25           |
| Lung and gastric fluid               | 0.70 | 0.07           | 28/29           |
| Oropharyngeal swab and gastric fluid | 0.76 | 0.02           | 35/32           |
| All three sites                      | 0.83 | 0.01           | 19/23           |

**Table 6: Classifiers based on perturbed relationship between lung and oropharyngeal microbiota can distinguish aspirators from non-aspirators.** Areas under the ROC curve (AUC) and Fisher p-values calculated from classifiers trained on the entire microbial communities. Each row is a different classifier based on different combinations of aerodigestive communities, indicated in the “Sites” column. In the multi-site classifiers, the abundances of OTUs in different sites were used as separate features. For each classifier type, 100 classifiers were built, with random patient splits and classifier initializations. Mean values are reported. The distribution of AUCs and Fisher p-values from all 100 repetitions are shown in Supplementary Figure 9.

|                                 | Mean (std)    |
|---------------------------------|---------------|
| Number of acid episodes         | 24.1 (26.9)   |
| Number of nonacid episodes      | 14.8 (16.4)   |
| Number of pH only episodes      | 16.6 (14.8)   |
| Number of total reflux episodes | 38.9 (33.8)   |
| Percent time proximal reflux    | 0.005 (0.005) |
| Percent time distal reflux      | 0.012 (0.011) |
| Percent time pH < 4             | 7.2 (11.5)    |
| Number abnormal by pH-metry     | 9             |
| Number abnormal by MII          | 4             |

Table 7: Reflux characteristics measured by pH-MII.

317 **7.2 Figures**

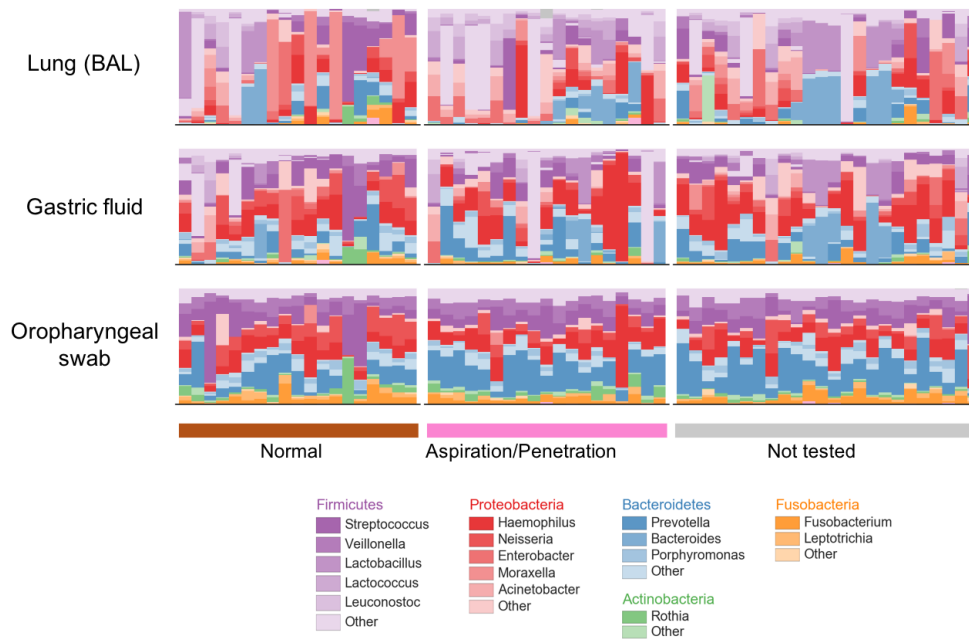

Figure 1: **Aerodigestive communities have similar predominant genera.** Bar plots showing relative abundances of aerodigestive OTUs collapsed to the genus level. Each column corresponds to one patient who had all three aerodigestive sites sequenced (N = 19 non-aspirators, 23 aspirators, 24 untested). Phyla in legend are those with mean abundance > 0.01 across all patients. Any other phyla are colored gray.

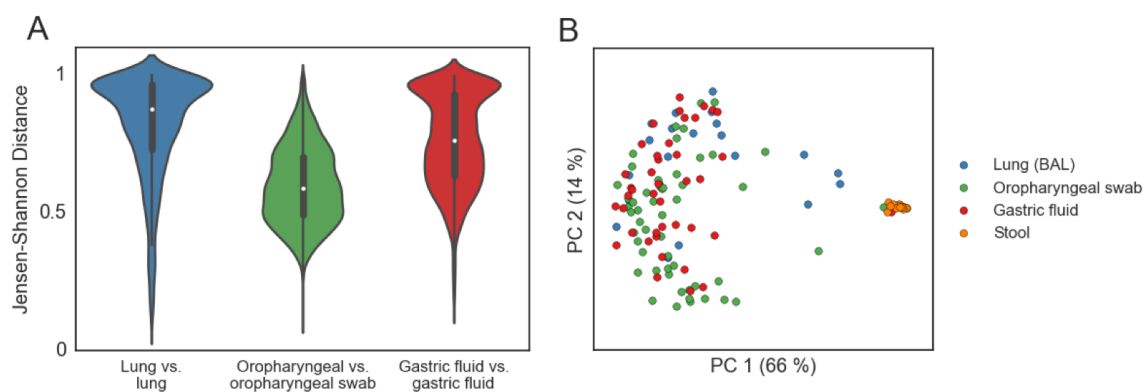

**Figure 2: Lung and gastric communities are more variable across people than oropharyngeal communities.** (A) Violin plot of the Jensen-Shannon distance (JSD) between samples from the same site across different patients. A JSD close to 1 indicates that communities are very different (less similar). (B) PCoA plots of aerodigestive and stool microbial communities for all patients in the 2016 sequencing batch (N = 21 BAL, 52 oropharyngeal swab, 43 gastric fluid, and 14 stool samples).



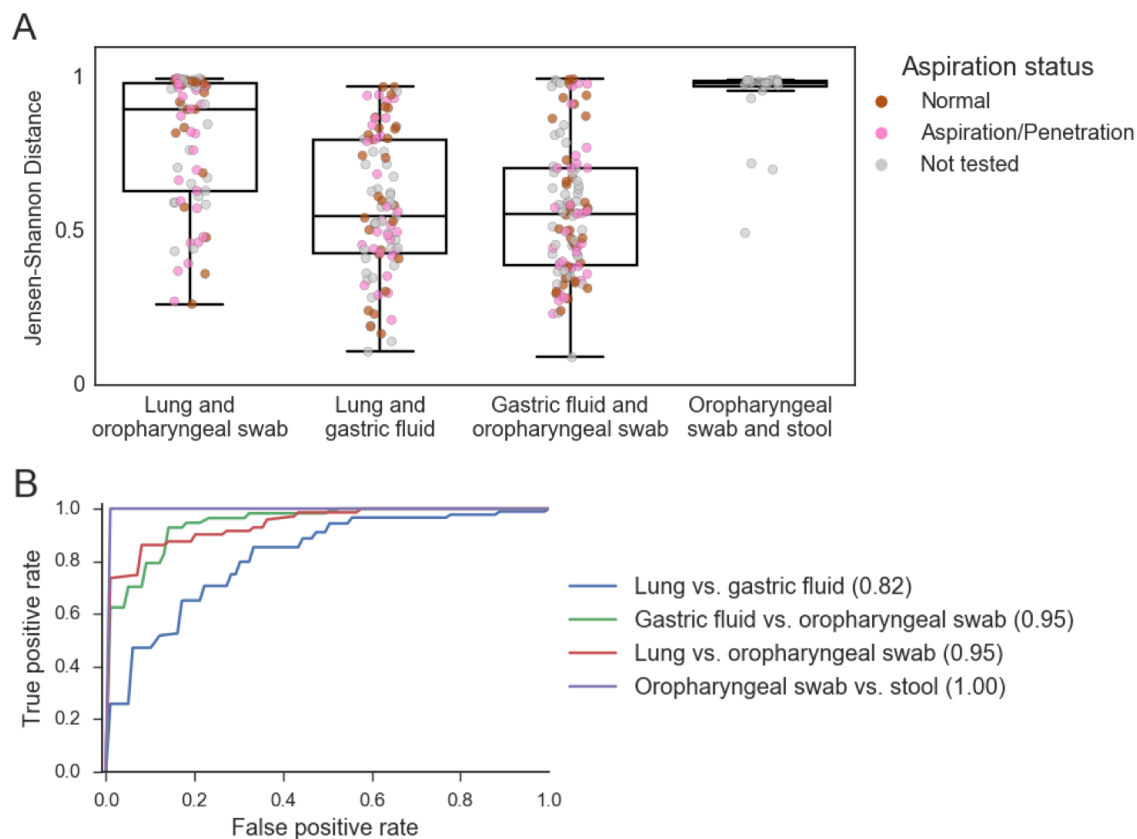

**Figure 3: Within patients, aerodigestive communities are similar but lung and oropharynx remain most distinct.** (A) Jensen-Shannon distances between samples from different sites from the same patient. Comparisons between stool and oropharynx are included to contextualize these results, as these are expected to be very different. All comparisons are significant (Wilcoxon rank sums test calculated with Python's `scipy.stats.ranksums` function) except the lung and gastric fluid vs. gastric fluid and oropharyngeal swab beta diversities ( $p = 0.6$ ). Lung and oropharyngeal vs. oropharyngeal and stool,  $p = 0.005$ . All other comparisons:  $p < 1 \times 10^{-8}$ . (B) ROC curve of classifiers distinguishing different aerodigestive sites. Mean areas under the ROC curve (AUCs) are reported in parentheses in the legend.

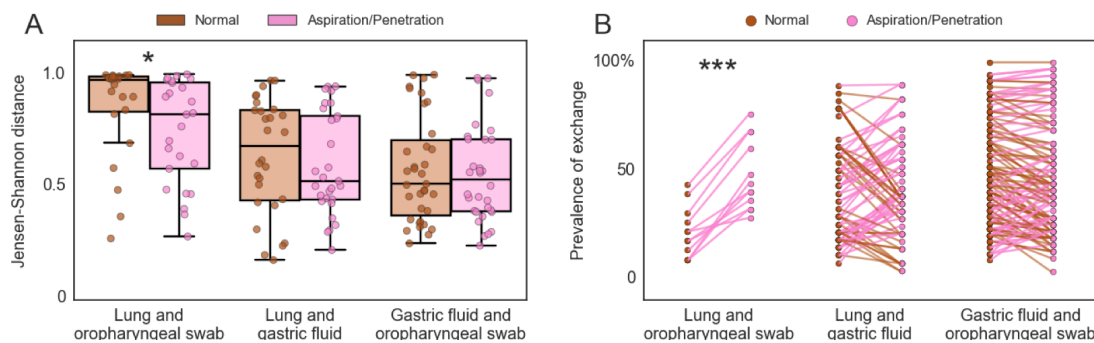

**Figure 4: Dysphagia increases aspiration of microbes from the oropharynx but not the stomach** (A) Intra-patient Jensen Shannon distance for different aerodigestive site comparisons in non-aspirators (brown) and aspirators (pink). Each point represents one patient. P-values (Wilcoxon rank sums test, calculated with Python’s `scipy.stats.ranksums` function): lung and oropharyngeal swab  $p = 0.04$ , lung and gastric fluid  $p = 0.5$ , gastric fluid and oropharyngeal swab  $p = 0.8$ . (B) Percentage of patients with the previously defined exchanged microbes present in both of the respective sites (x-axis) in non-aspirators (brown) and aspirators (pink). Each pair of points represents one exchanged OTU. P-values (paired t-test on  $\log_{10}$  prevalence values, calculated with Python’s `scipy.stats.ttest_rel` function): lung and oropharyngeal swab  $p = 3 \times 10^{-5}$ , lung and gastric fluid  $p = 0.8$ , gastric fluid and oropharyngeal swab  $p = 0.09$ .

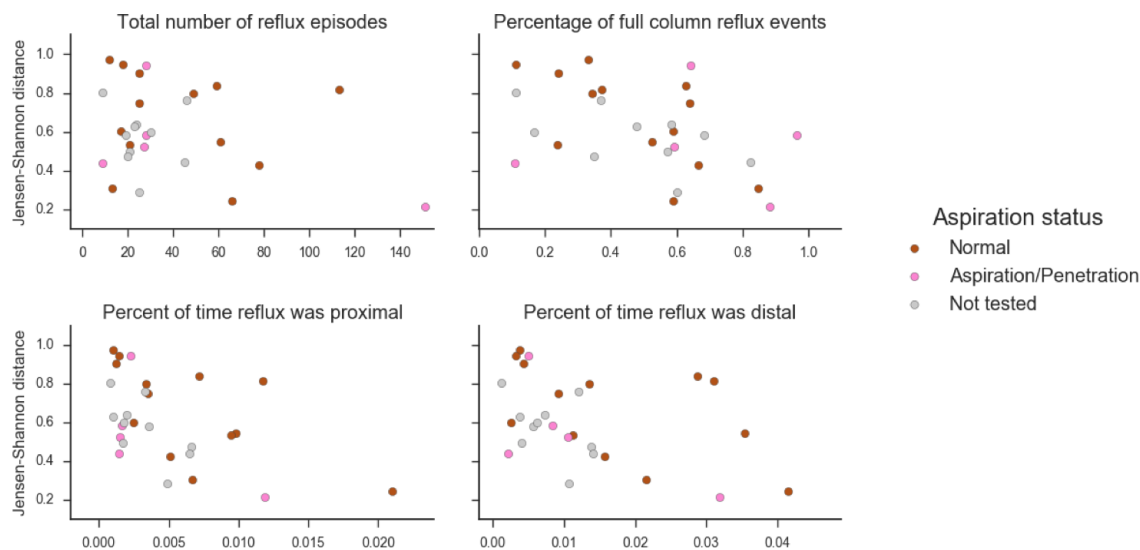

**Figure 5: Reflux severity may correlate with the similarity between lung and gastric communities.** Each plot shows the correlation between different reflux measures and the within-patient Jensen-Shannon distance between BAL and gastric fluid samples. Points are colored according to aspiration status. All reflux measures include both acid- and non-acid reflux. Spearman correlation and p-values: total number of reflux episodes  $\rho_s = -0.14$ ,  $p = 0.5$ , percentage of full column reflux events  $\rho_s = -0.41$ ,  $p = 0.03$ , percent of time reflux was proximal  $\rho_s = -0.47$ ,  $p = 0.01$ , percent of time reflux was distal  $\rho_s = -0.43$ ,  $p = 0.02$ .

## <sup>318</sup> 8 Supplementary Tables and Figures

### <sup>319</sup> 8.1 Supplementary Tables

| Family                       | Genus               | Non-aspirator | Aspirator | Difference |
|------------------------------|---------------------|---------------|-----------|------------|
| Neisseriaceae                | Neisseria           | 7.1           | 41.4      | 34.2       |
| Porphyromonadaceae           | Porphyromonas       | 28.6          | 62.1      | 33.5       |
| Pasteurellaceae              | Haemophilus         | 50.0          | 82.8      | 32.8       |
| Lachnospiraceae              | Coprococcus         | 10.7          | 37.9      | 27.2       |
| Micrococcaceae               | Rothia              | 14.3          | 41.4      | 27.1       |
| Prevotellaceae               | Prevotella          | 25.0          | 51.7      | 26.7       |
| Carnobacteriaceae            | Granulicatella      | 32.1          | 58.6      | 26.5       |
| Bacillales_Incertae_Sedis_XI | Gemella             | 42.9          | 69.0      | 26.1       |
| Pasteurellaceae              | Haemophilus         | 57.1          | 82.8      | 25.6       |
| Actinomycetaceae             | Actinomyces         | 17.9          | 41.4      | 23.5       |
| Streptococcaceae             | Streptococcus       | 39.3          | 62.1      | 22.8       |
| Lachnospiraceae              | Oribacterium        | 14.3          | 34.5      | 20.2       |
| Leptotrichiaceae             | Streptobacillus     | 17.9          | 37.9      | 20.1       |
| Lachnospiraceae              | Lachnoanaerobaculum | 17.9          | 37.9      | 20.1       |
| Fusobacteriaceae             | Fusobacterium       | 42.9          | 62.1      | 19.2       |
| Prevotellaceae               |                     | 50.0          | 69.0      | 19.0       |
| Flavobacteriaceae            | Planobacterium      | 14.3          | 31.0      | 16.7       |
| Leptotrichiaceae             | Leptotrichia        | 14.3          | 31.0      | 16.7       |
| Erysipelotrichaceae          | Solobacterium       | 17.9          | 34.5      | 16.6       |
| Prevotellaceae               | Prevotella          | 21.4          | 37.9      | 16.5       |
| Pasteurellaceae              | Haemophilus         | 28.6          | 44.8      | 16.3       |
| Veillonellaceae              | Veillonella         | 35.7          | 51.7      | 16.0       |
| Prevotellaceae               |                     | 46.4          | 62.1      | 15.6       |
| Neisseriaceae                | Neisseria           | 75.0          | 90.6      | 15.6       |
| Streptococcaceae             | Streptococcus       | 75.0          | 89.7      | 14.7       |
| Veillonellaceae              | Veillonella         | 35.7          | 48.3      | 12.6       |
| Micrococcaceae               | Rothia              | 42.9          | 55.2      | 12.3       |
| Streptococcaceae             | Streptococcus       | 42.9          | 55.2      | 12.3       |
| Prevotellaceae               | Prevotella          | 42.9          | 55.2      | 12.3       |
| Prevotellaceae               | Prevotella          | 64.3          | 75.9      | 11.6       |
| Unknown_Burkholderiales      |                     | 10.7          | 20.7      | 10.0       |
| Bacteroidaceae               | Bacteroides         | 14.3          | 24.1      | 9.9        |
| Porphyromonadaceae           | Porphyromonas       | 21.4          | 31.0      | 9.6        |
| Moraxellaceae                | Moraxella           | 39.3          | 48.3      | 9.0        |
| Prevotellaceae               | Prevotella          | 57.1          | 65.5      | 8.4        |
| Leptotrichiaceae             | Leptotrichia        | 21.4          | 27.6      | 6.2        |
| Fusobacteriaceae             | Fusobacterium       | 25.0          | 31.0      | 6.0        |
| Porphyromonadaceae           | Porphyromonas       | 50.0          | 55.2      | 5.2        |
| Neisseriaceae                | Neisseria           | 17.9          | 20.7      | 2.8        |
| Veillonellaceae              | Veillonella         | 89.3          | 89.7      | 0.4        |
| Unknown_Bacteria             |                     | 21.4          | 20.7      | -0.7       |
| Coriobacteriaceae            | Atopobium           | 21.4          | 20.7      | -0.7       |
| Enterococcaceae              |                     | 85.7          | 82.8      | -3.0       |
| Chloroplast                  | Streptophyta        | 10.7          | 6.9       | -3.8       |
| Pasteurellaceae              | Haemophilus         | 17.9          | 13.8      | -4.1       |
| Unknown_Bacillales           |                     | 17.9          | 13.8      | -4.1       |
| Lactobacillaceae             | Lactobacillus       | 28.6          | 17.2      | -11.3      |
| Pasteurellaceae              | Haemophilus         | 32.1          | 20.7      | -11.5      |
| Staphylococcaceae            | Staphylococcus      | 60.7          | 48.3      | -12.4      |
| Comamonadaceae               | Acidovorax          | 17.9          | 3.4       | -14.4      |
| Porphyromonadaceae           | Parabacteroides     | 21.4          | 6.9       | -14.5      |
| Comamonadaceae               | Pelomonas           | 21.4          | 6.9       | -14.5      |
| Flavobacteriaceae            | Chryseobacterium    | 28.6          | 13.8      | -14.8      |
| Erysipelotrichaceae          | Clostridium_XVIII   | 21.4          | 3.4       | -18.0      |
| Lachnospiraceae              | Ruminococcus2       | 25.0          | 6.9       | -18.1      |
| Flavobacteriaceae            | Chryseobacterium    | 50.0          | 31.0      | -19.0      |
| Neisseriaceae                | Microvirgula        | 57.1          | 37.9      | -19.2      |
| Enterobacteriaceae           | Enterobacter        | 82.1          | 62.1      | -20.1      |
| Mycobacteriaceae             | Mycobacterium       | 28.6          | 6.9       | -21.7      |
| Moraxellaceae                | Acinetobacter       | 60.7          | 37.9      | -22.8      |
| Streptococcaceae             | Streptococcus       | 60.7          | 37.9      | -22.8      |
| Bacteroidaceae               | Bacteroides         | 53.6          | 27.6      | -26.0      |
| Unknown_Bacillales           |                     | 57.1          | 31.0      | -26.1      |
| Moraxellaceae                | Acinetobacter       | 60.7          | 34.5      | -26.2      |
| Moraxellaceae                | Enhydrobacter       | 60.7          | 34.5      | -26.2      |
| Lactobacillaceae             | Lactobacillus       | 50.0          | 20.7      | -29.3      |
| Aeromonadaceae               | Aeromonas           | 57.1          | 27.6      | -29.6      |
| Moraxellaceae                | Acinetobacter       | 78.6          | 41.4      | -37.2      |
| Leuconostocaceae             | Leuconostoc         | 78.6          | 37.9      | -40.6      |
| Leuconostocaceae             | Weissella           | 78.6          | 37.9      | -40.6      |
| Moraxellaceae                | Acinetobacter       | 78.6          | 37.9      | -40.6      |
| Streptococcaceae             | Lactococcus         | 78.6          | 37.9      | -40.6      |
| Streptococcaceae             | Lactococcus         | 78.6          | 37.9      | -40.6      |

bioRxiv preprint doi: <https://doi.org/10.1101/476580>; this version posted November 23, 2018. The copyright holder for this preprint (which was not certified by peer review) is the author/funder, who has granted bioRxiv a license to display the preprint in perpetuity. It is made available under aCC-BY-NC 4.0 International license.

Table 8: Prevalence of lung-gastric fluid exchanged OTUs. Prevalence is calculated as the percentage of patients who have the OTU present in both their lungs and oropharynx, calculated separately among aspirators (N = 29) and non-aspirators (N = 28). OTUs are ordered by their differential prevalence in aspirators relative to non-aspirators, and are labeled with their family- and genus-level taxonomies. Blank genus names indicate OTUs which were not annotated at the genus level.

| <b>Lung-oropharynx OTUs (12)</b> | AUC  | p    | N (non-asp/asp) |
|----------------------------------|------|------|-----------------|
| Lung                             | 0.60 | 0.32 | 33/33           |
| Oropharyngeal                    | 0.64 | 0.13 | 43/36           |
| Both                             | 0.73 | 0.14 | 23/25           |

  

| <b>Lung-gastric OTUs (75)</b> | AUC  | p    | N (non-asp/asp) |
|-------------------------------|------|------|-----------------|
| Lung                          | 0.61 | 0.42 | 33/33           |
| Gastric fluid                 | 0.68 | 0.04 | 48/41           |
| Both                          | 0.71 | 0.07 | 28/29           |

Table 9: **Classifiers based on the abundance of exchanged OTUs.** (Top) Classifiers built from the abundance of lung-oropharynx exchanged OTUs. (Bottom) Classifiers built from the abundance of lung-gastric exchanged OTUs. Rows indicate which microbial community was used to train each classifier. In classifiers using two sites (“Both”), abundances of each exchanged OTU in each site were considered as separate features. AUCs are calculated as the area under the average ROC curve from five-fold cross validation. Fisher’s exact p values are calculated on the predictions on the hold-out data for all cross validation folds using Python’s `scipy.stats.fisher_exact` function. Each classifier was built 100 times with random patient splits and classifier initializations, and mean values are reported here. AUCs and Fisher p-values from all 100 repetitions for all classifiers are shown in Supplementary Figures 7 and 8.)

## 320 8.2 Supplementary Figures

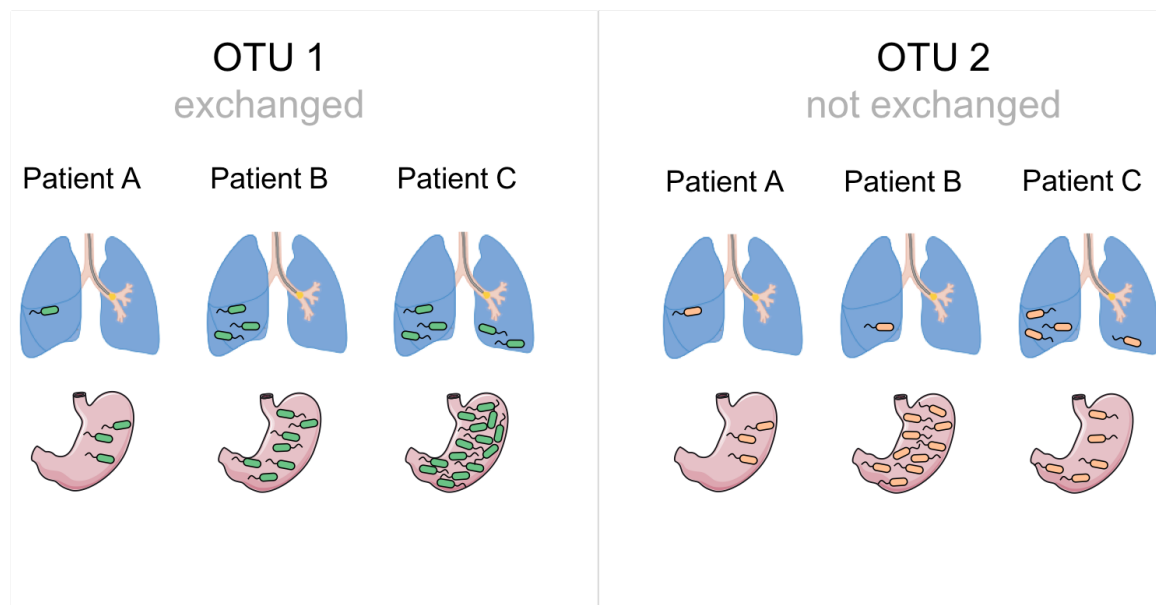

Figure 6: Schematic illustrating an OTU which is considered exchanged between the lung and stomach (left) and one which is not (right). If an OTU is exchanged in two sites, its abundance in the two sites should be correlated across patients. Lung image was adapted from Cancer Research UK / Wikimedia Commons and the stomach image from Servier Medical Art.

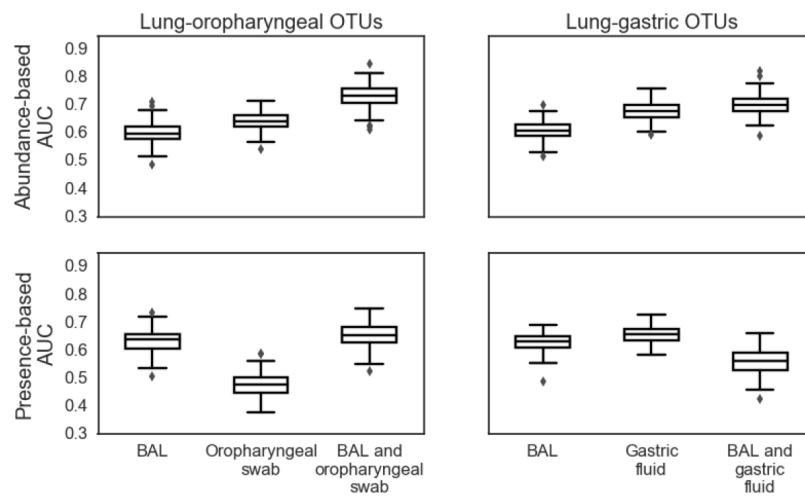

Figure 7: Areas under the ROC curve (AUC) for 100 classifiers trained on the abundance (top) or presence (bottom) of lung-oropharynx exchanged OTUs (left) or lung-gastric exchanged OTUs (right).

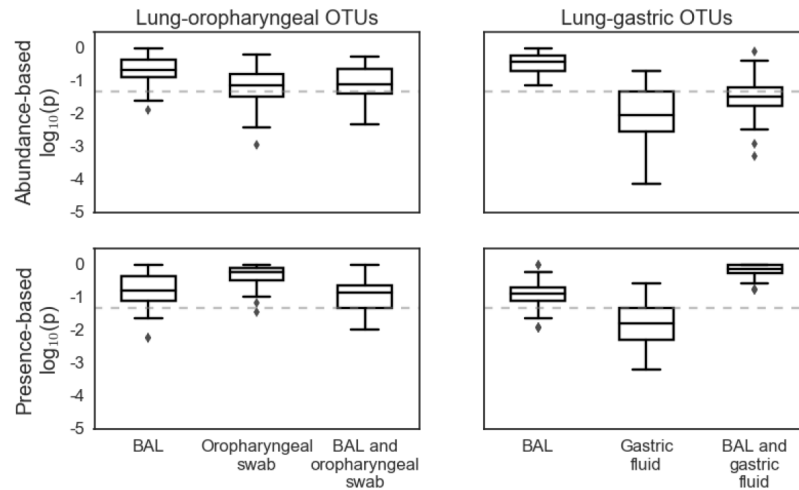

Figure 8: Log of the Fisher p-values for 100 classifiers trained on the abundance (top) or presence (bottom) of lung-orpharynx exchanged OTUs (left) or lung-gastric exchanged OTUs (right). Dashed line indicates  $p = 0.05$ .

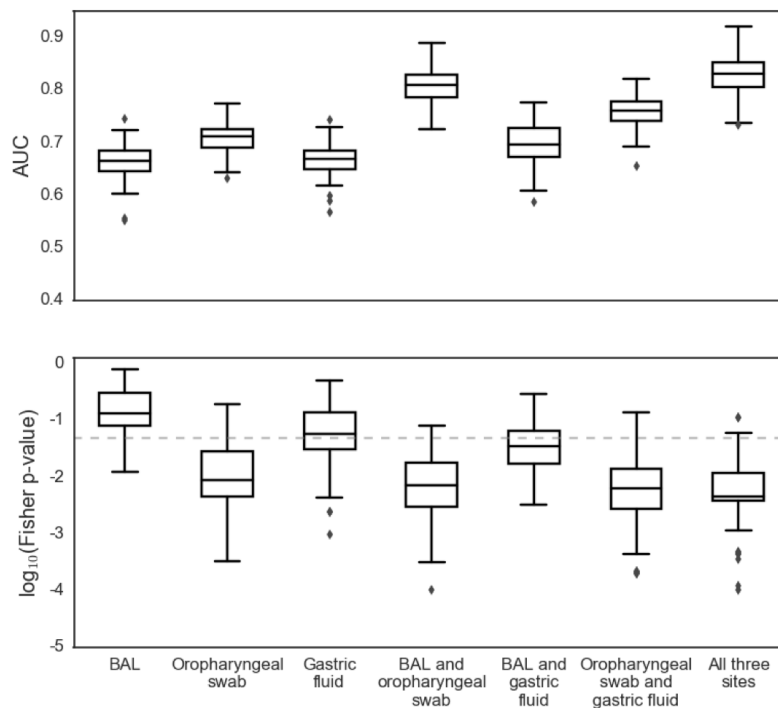

Figure 9: Area under the ROC curve (AUC) (top) and Fisher p-values (bottom) for 100 classifiers trained on different combinations of the full aerodigestive communities to distinguish aspirators from non-aspirators. Dashed line on the p value plot is  $p = 0.05$ .

## References

- 321
- 322 [1] M. A. Holas, K. L. DePippo, and M. J. Reding. Aspiration and relative risk of medi-  
323 cal complications following stroke. *Archives of Neurology*, 51(10):1051–1053, oct 1994. doi:  
324 10.1001/archneur.1994.00540220099020. URL [https://doi.org/10.1001/archneur.1994.](https://doi.org/10.1001/archneur.1994.00540220099020)  
325 [00540220099020](https://doi.org/10.1001/archneur.1994.00540220099020).
- 326 [2] J. Thomson, M. Hall, L. Ambroggio, B. Stone, R. Srivastava, S. S. Shah, and J. G. Berry.  
327 Aspiration and non-aspiration pneumonia in hospitalized children with neurologic impairment.  
328 *Pediatrics*, 137(2):e20151612–e20151612, jan 2016. doi: 10.1542/peds.2015-1612. URL <https://doi.org/10.1542/peds.2015-1612>.  
329 [//doi.org/10.1542/peds.2015-1612](https://doi.org/10.1542/peds.2015-1612).
- 330 [3] Douglas C. Barnhart, Matthew Hall, Sanjay Mahant, Adam B. Goldin, Jay G. Berry, Roger G.  
331 Faix, J. Michael Dean, and Rajendu Srivastava. Effectiveness of fundoplication at the time of  
332 gastrostomy in infants with neurological impairment. *JAMA Pediatrics*, 167(10):911, oct 2013.  
333 doi: 10.1001/jamapediatrics.2013.334. URL [https://doi.org/10.1001/jamapediatrics.](https://doi.org/10.1001/jamapediatrics.2013.334)  
334 [2013.334](https://doi.org/10.1001/jamapediatrics.2013.334).
- 335 [4] Steven L. Lee, Hooman Shabatian, Jin-Wen Hsu, Harry Applebaum, and Philip I. Haigh. Hospi-  
336 tal admissions for respiratory symptoms and failure to thrive before and after nissen fundoplica-  
337 tion. *Journal of Pediatric Surgery*, 43(1):59–65, jan 2008. doi: 10.1016/j.jpedsurg.2007.09.020.  
338 URL <https://doi.org/10.1016/j.jpedsurg.2007.09.020>.
- 339 [5] A. B. Goldin, R. Sawin, K. D. Seidel, and D. R. Flum. Do antireflux operations decrease the  
340 rate of reflux-related hospitalizations in children? *Pediatrics*, 118(6):2326–2333, dec 2006. doi:  
341 10.1542/peds.2006-2212. URL <https://doi.org/10.1542/peds.2006-2212>.
- 342 [6] Jennifer Yeh, Sharon A. McGrath-Morrow, and Joseph M. Collaco. Oxygen weaning after  
343 hospital discharge in children with bronchopulmonary dysplasia. *Pediatric Pulmonology*, 51(11):  
344 1206–1211, apr 2016. doi: 10.1002/ppul.23442. URL <https://doi.org/10.1002/ppul.23442>.
- 345 [7] R. Srivastava, E. C. Downey, M. O’Gorman, P. Feola, M. Samore, R. Holubkov, M. Mundorff,  
346 B. C. James, P. Rosenbaum, P. C. Young, and J. M. Dean. Impact of fundoplication versus  
347 gastrojejunal feeding tubes on mortality and in preventing aspiration pneumonia in young  
348 children with neurologic impairment who have gastroesophageal reflux disease. *PEDIATRICS*,  
349 123(1):338–345, 2009. doi: 10.1542/peds.2007-1740. URL [https://doi.org/10.1542/peds.](https://doi.org/10.1542/peds.2007-1740)  
350 [2007-1740](https://doi.org/10.1542/peds.2007-1740).
- 351 [8] Christine M. Bassis, John R. Erb-Downward, Robert P. Dickson, Christine M. Freeman,  
352 Thomas M. Schmidt, Vincent B. Young, James M. Beck, Jeffrey L. Curtis, and Gary B. Huff-  
353 nagle. Analysis of the upper respiratory tract microbiotas as the source of the lung and gastric  
354 microbiotas in healthy individuals. *mBio*, 6(2):e00037–15, 2015. doi: 10.1128/mbio.00037-15.  
355 URL <https://doi.org/10.1128/mbio.00037-15>.
- 356 [9] Emily S. Charlson, Kyle Bittinger, Andrew R. Haas, Ayannah S. Fitzgerald, Ian Frank, Anjana  
357 Yadav, Frederic D. Bushman, and Ronald G. Collman. Topographical continuity of bacterial



- 358 populations in the healthy human respiratory tract. *American Journal of Respiratory and*  
359 *Critical Care Medicine*, 184(8):957–963, 2011. doi: 10.1164/rccm.201104-0655oc. URL <https://doi.org/10.1164%2Frccm.201104-0655oc>.
- 360
- 361 [10] Rachel Rosen, Lan Hu, Janine Amirault, Umakanth Khatwa, Doyle V. Ward, and Andrew  
362 Onderdonk. 16s community profiling identifies proton pump inhibitor related differences in  
363 gastric, lung, and oropharyngeal microflora. *The Journal of Pediatrics*, 166(4):917–923, apr  
364 2015. doi: 10.1016/j.jpeds.2014.12.067. URL [https://doi.org/10.1016/j.jpeds.2014.12.](https://doi.org/10.1016/j.jpeds.2014.12.067)  
365 [067](https://doi.org/10.1016/j.jpeds.2014.12.067).
- 366 [11] Arvind Venkataraman, Christine M. Bassis, James M. Beck, Vincent B. Young, Jeffrey L.  
367 Curtis, Gary B. Huffnagle, and Thomas M. Schmidt. Application of a neutral community  
368 model to assess structuring of the human lung microbiome. *mBio*, 6(1):e02284–14, jan 2015.  
369 doi: 10.1128/mbio.02284-14. URL <https://doi.org/10.1128%2Fmbio.02284-14>.
- 370 [12] Leopoldo N Segal, Alexander V Alekseyenko, Jose C Clemente, Rohan Kulkarni, Benjamin  
371 Wu, Hao Chen, Kenneth I Berger, Roberta M Goldring, William N Rom, Martin J Blaser, and  
372 Michael D Weiden. Enrichment of lung microbiome with supraglottic taxa is associated with  
373 increased pulmonary inflammation. *Microbiome*, 1(1):19, 2013. doi: 10.1186/2049-2618-1-19.  
374 URL <https://doi.org/10.1186%2F2049-2618-1-19>.
- 375 [13] John R. Erb-Downward, Deborah L. Thompson, Meilan K. Han, Christine M. Freeman, Lisa  
376 McCloskey, Lindsay A. Schmidt, Vincent B. Young, Galen B. Toews, Jeffrey L. Curtis, Baskaran  
377 Sundaram, Fernando J. Martinez, and Gary B. Huffnagle. Analysis of the lung microbiome in  
378 the “healthy” smoker and in COPD. *PLoS ONE*, 6(2):e16384, feb 2011. doi: 10.1371/journal.  
379 pone.0016384. URL <https://doi.org/10.1371%2Fjournal.pone.0016384>.
- 380 [14] Alison Morris, James M. Beck, Patrick D. Schloss, Thomas B. Campbell, Kristina Crothers,  
381 Jeffrey L. Curtis, Sonia C. Flores, Andrew P. Fontenot, Elodie Ghedin, Laurence Huang, Kath-  
382 leen Jablonski, Eric Klerup, Susan V. Lynch, Erica Sodergren, Homer Twigg, Vincent B.  
383 Young, Christine M. Bassis, Arvind Venkataraman, Thomas M. Schmidt, and George M. We-  
384 instock. Comparison of the respiratory microbiome in healthy nonsmokers and smokers. *Amer-*  
385 *ican Journal of Respiratory and Critical Care Medicine*, 187(10):1067–1075, may 2013. doi:  
386 10.1164/rccm.201210-1913oc. URL <https://doi.org/10.1164%2Frccm.201210-1913oc>.
- 387 [15] Hutsaya Tantipong, Chantana Morkchareonpong, Songyod Jaiyindee, and Visanu Thamlikitkul.  
388 Randomized controlled trial and meta-analysis of oral decontamination with 2% chlorhexidine  
389 solution for the prevention of ventilator-associated pneumonia. *Infection Control & Hospital*  
390 *Epidemiology*, 29(02):131–136, feb 2008. doi: 10.1086/526438. URL [https://doi.org/10.](https://doi.org/10.1086/526438)  
391 [1086/526438](https://doi.org/10.1086/526438).
- 392 [16] Mirelle Koeman, Andre J. A. M. van der Ven, Eelko Hak, Hans C. A. Joore, Karin Kaas-  
393 jager, Annemarie G. A. de Smet, Graham Ramsay, Tom P. J. Dormans, Leon P. H. J.  
394 Aarts, Ernst E. de Bel, Willem N. M. Hustinx, Ingeborg van der Tweel, Andy M. Hoe-  
395 pelman, and Marc J. M. Bonten. Oral decontamination with chlorhexidine reduces the

- 396 incidence of ventilator-associated pneumonia. *American Journal of Respiratory and Criti-*  
397 *cal Care Medicine*, 173(12):1348–1355, jun 2006. doi: 10.1164/rccm.200505-820oc. URL  
398 <https://doi.org/10.1164/rccm.200505-820oc>.
- 399 [17] Hong bo Hu, Han ju Huang, Qiao ying Peng, Jia Lu, and Xing yun Lei. Prospective study  
400 of colonization and infection because of pseudomonas aeruginosa in mechanically ventilated  
401 patients at a neonatal intensive care unit in china. *American Journal of Infection Control*, 38  
402 (9):746–750, nov 2010. doi: 10.1016/j.ajic.2010.02.012. URL [https://doi.org/10.1016/j.](https://doi.org/10.1016/j.ajic.2010.02.012)  
403 [ajic.2010.02.012](https://doi.org/10.1016/j.ajic.2010.02.012).
- 404 [18] Leopoldo N. Segal, Jose C. Clemente, Jun-Chieh J. Tsay, Sergei B. Koralov, Brian C. Keller,  
405 Benjamin G. Wu, Yonghua Li, Nan Shen, Elodie Ghedin, Alison Morris, Phillip Diaz, Laurence  
406 Huang, William R. Wikoff, Carles Ubeda, Alejandro Artacho, William N. Rom, Daniel H.  
407 Serman, Ronald G. Collman, Martin J. Blaser, and Michael D. Weiden. Enrichment of the  
408 lung microbiome with oral taxa is associated with lung inflammation of a th17 phenotype.  
409 *Nature Microbiology*, 1(5), apr 2016. doi: 10.1038/nmicrobiol.2016.31. URL [https://doi.](https://doi.org/10.1038/nmicrobiol.2016.31)  
410 [org/10.1038/nmicrobiol.2016.31](https://doi.org/10.1038/nmicrobiol.2016.31).
- 411 [19] Rachel Rosen and Samuel Nurko. The importance of multichannel intraluminal impedance  
412 in the evaluation of children with persistent respiratory symptoms. *The American Journal of*  
413 *Gastroenterology*, 99(12):2452–2458, dec 2004. doi: 10.1111/j.1572-0241.2004.40268.x. URL  
414 <https://doi.org/10.1111/j.1572-0241.2004.40268.x>.
- 415 [20] Qiong Wang, George M Garrity, James M Tiedje, and James R Cole. Naive bayesian classifier for  
416 rapid assignment of rna sequences into the new bacterial taxonomy. *Applied and environmental*  
417 *microbiology*, 73(16):5261–5267, 2007.
- 418 [21] E. K. Costello, C. L. Lauber, M. Hamady, N. Fierer, J. I. Gordon, and R. Knight. Bacterial  
419 community variation in human body habitats across space and time. *Science*, 326(5960):1694–  
420 1697, nov 2009. doi: 10.1126/science.1177486. URL [https://doi.org/10.1126/science.](https://doi.org/10.1126/science.1177486)  
421 [1177486](https://doi.org/10.1126/science.1177486).
- 422 [22] Curtis Huttenhower, Dirk Gevers, Rob Knight, Sahar Abubucker, Jonathan H. Badger, Asif T.  
423 Chinwalla, Heather H. Creasy, Ashlee M. Earl, Michael G. FitzGerald, Robert S. Fulton,  
424 Michelle G. Giglio, Kymberlie Hallsworth-Pepin, Elizabeth A. Lobos, Ramana Madupu, Vincent  
425 Magrini, John C. Martin, Makedonka Mitreva, Donna M. Muzny, Erica J. Sodergren, James  
426 Versalovic, Aye M. Wollam, Kim C. Worley, Jennifer R. Wortman, Sarah K. Young, Qiangdong  
427 Zeng, Kjersti M. Aagaard, Olukemi O. Abolude, Emma Allen-Vercoe, Eric J. Alm, Lucia Al-  
428 varado, Gary L. Andersen, Scott Anderson, Elizabeth Appelbaum, Harindra M. Arachchi, Gary  
429 Armitage, Cesar A. Arze, Tulin Ayvaz, Carl C. Baker, Lisa Begg, Tsegahiwot Belachew, Veena  
430 Bhonagiri, Monika Bihan, Martin J. Blaser, Toby Bloom, Vivien Bonazzi, J. Paul Brooks, Gre-  
431 gory A. Buck, Christian J. Buhay, Dana A. Busam, Joseph L. Campbell, Shane R. Canon,  
432 Brandi L. Cantarel, Patrick S. G. Chain, I-Min A. Chen, Lei Chen, Shaila Chhibba, Ken  
433 Chu, Dawn M. Ciulla, Jose C. Clemente, Sandra W. Clifton, Sean Conlan, Jonathan Crab-  
434 tree, Mary A. Cutting, Noam J. Davidovics, Catherine C. Davis, Todd Z. DeSantis, Carolyn

435 Deal, Kimberley D. Delehaunty, Floyd E. Dewhirst, Elena Deych, Yan Ding, David J. Dooling,  
436 Shannon P. Dugan, Wm Michael Dunne, A. Scott Durkin, Robert C. Edgar, Rachel L.  
437 Erlich, Candace N. Farmer, Ruth M. Farrell, Karoline Faust, Michael Feldgarden, Victor M.  
438 Felix, Sheila Fisher, Anthony A. Fodor, Larry J. Forney, Leslie Foster, Valentina Di Francesco,  
439 Jonathan Friedman, Dennis C. Friedrich, Catrina C. Fronick, Lucinda L. Fulton, Hongyu Gao,  
440 Nathalia Garcia, Georgia Giannoukos, Christina Giblin, Maria Y. Giovanni, Jonathan M. Gold-  
441 berg, Johannes Goll, Antonio Gonzalez, Allison Griggs, Sharvari Gujja, Susan Kinder Haake,  
442 Brian J. Haas, Holli A. Hamilton, Emily L. Harris, Theresa A. Hepburn, Brandi Herter, Di-  
443 ane E. Hoffmann, Michael E. Holder, Clinton Howarth, Katherine H. Huang, Susan M. Huse,  
444 Jacques Izard, Janet K. Jansson, Huaiyang Jiang, Catherine Jordan, Vandita Joshi, James A.  
445 Katancik, Wendy A. Keitel, Scott T. Kelley, Cristyn Kells, Nicholas B. King, Dan Knights,  
446 Heidi H. Kong, Omry Koren, Sergey Koren, Karthik C. Kota, Christie L. Kovar, Nikos C.  
447 Kyrpides, Patricio S. La Rosa, Sandra L. Lee, Katherine P. Lemon, Niall Lennon, Cecil M.  
448 Lewis, Lora Lewis, Ruth E. Ley, Kelvin Li, Konstantinos Liolios, Bo Liu, Yue Liu, Chien-Chi  
449 Lo, Catherine A. Lozupone, R. Dwayne Lunsford, Tessa Madden, Anup A. Mahurkar, Peter J.  
450 Mannon, Elaine R. Mardis, Victor M. Markowitz, Konstantinos Mavromatis, Jamison M. Mc-  
451 Corrison, Daniel McDonald, Jean McEwen, Amy L. McGuire, Pamela McInnes, Teena Mehta,  
452 Kathie A. Mihindukulasuriya, Jason R. Miller, Patrick J. Minx, Irene Newsham, Chad Nus-  
453 baum, Michelle O’Laughlin, Joshua Orvis, Ioanna Pagani, Krishna Palaniappan, Shital M.  
454 Patel, Matthew Pearson, Jane Peterson, Mircea Podar, Craig Pohl, Katherine S. Pollard, Mihai  
455 Pop, Margaret E. Priest, Lita M. Proctor, Xiang Qin, Jeroen Raes, Jacques Ravel, Jeffrey G.  
456 Reid, Mina Rho, Rosamond Rhodes, Kevin P. Riehle, Maria C. Rivera, Beltran Rodriguez-  
457 Mueller, Yu-Hui Rogers, Matthew C. Ross, Carsten Russ, Ravi K. Sanka, Pamela Sankar, J. Fah  
458 Sathirapongsasuti, Jeffery A. Schloss, Patrick D. Schloss, Thomas M. Schmidt, Matthew Scholz,  
459 Lynn Schriml, Alyxandria M. Schubert, Nicola Segata, Julia A. Segre, William D. Shannon,  
460 Richard R. Sharp, Thomas J. Sharpton, Narmada Shenoy, Nihar U. Sheth, Gina A. Simone, In-  
461 dresh Singh, Christopher S. Smillie, Jack D. Sobel, Daniel D. Sommer, Paul Spicer, Granger G.  
462 Sutton, Sean M. Sykes, Diana G. Tabbaa, Mathangi Thiagarajan, Chad M. Tomlinson, Man-  
463 lito Torralba, Todd J. Treangen, Rebecca M. Truty, Tatiana A. Vishnivetskaya, Jason Walker,  
464 Lu Wang, Zhengyuan Wang, Doyle V. Ward, Wesley Warren, Mark A. Watson, Christopher  
465 Wellington, Kris A. Wetterstrand, James R. White, Katarzyna Wilczek-Boney, YuanQing Wu,  
466 Kristine M. Wylie, Todd Wylie, Chandri Yandava, Liang Ye, Yuzhen Ye, Shibu Yooseph, Bon-  
467 nie P. Youmans, Lan Zhang, Yanjiao Zhou, Yiming Zhu, Laurie Zoloth, Jeremy D. Zucker,  
468 Bruce W. Birren, Richard A. Gibbs, Sarah K. Highlander, Barbara A. Methé, Karen E. Nelson,  
469 Joseph F. Petrosino, George M. Weinstock, Richard K. Wilson, and Owen White. Structure,  
470 function and diversity of the healthy human microbiome. *Nature*, 486(7402):207–214, jun 2012.  
471 doi: 10.1038/nature11234. URL <https://doi.org/10.1038/nature11234>.

472 [23] C. A. Lozupone, J. Stombaugh, A. Gonzalez, G. Ackermann, D. Wendel, Y. Vazquez-Baeza,  
473 J. K. Jansson, J. I. Gordon, and R. Knight. Meta-analyses of studies of the human microbiota.  
474 *Genome Research*, 23(10):1704–1714, jul 2013. doi: 10.1101/gr.151803.112. URL [https://](https://doi.org/10.1101/gr.151803.112)  
475 [doi.org/10.1101/gr.151803.112](https://doi.org/10.1101/gr.151803.112).

- 476 [24] Kelly Weir, Sandra McMahon, Linda Barry, Robert Ware, I Brent Masters, and Anne B.  
477 Chang. Oropharyngeal aspiration and pneumonia in children. *Pediatric Pulmonology*, 42(11):  
478 1024–1031, 2007. doi: 10.1002/ppul.20687. URL <https://doi.org/10.1002/ppul.20687>.
- 479 [25] O. Ortega, O. Sakwinska, S. Combremont, B. Berger, J. Sauser, C. Parra, S. Zarcero, J. Nart,  
480 S. Carrión, and P. Clavé. High prevalence of colonization of oral cavity by respiratory pathogens  
481 in frail older patients with oropharyngeal dysphagia. *Neurogastroenterology & Motility*, 27(12):  
482 1804–1816, sep 2015. doi: 10.1111/nmo.12690. URL <https://doi.org/10.1111/nmo.12690>.
- 483 [26] Kentaro Akata, Kazuhiro Yatera, Kei Yamasaki, Toshinori Kawanami, Keisuke Naito, Shingo  
484 Noguchi, Kazumasa Fukuda, Hiroshi Ishimoto, Hatsumi Taniguchi, and Hiroshi Mukae. The  
485 significance of oral streptococci in patients with pneumonia with risk factors for aspiration:  
486 the bacterial floral analysis of 16s ribosomal RNA gene using bronchoalveolar lavage fluid.  
487 *BMC Pulmonary Medicine*, 16(1), may 2016. doi: 10.1186/s12890-016-0235-z. URL <https://doi.org/10.1186/s12890-016-0235-z>.
- 489 [27] Shinya Kageyama, Toru Takeshita, Michiko Furuta, Mikiko Tomioka, Mikari Asakawa, Shino  
490 Suma, Kenji Takeuchi, Yukie Shibata, Yasuyuki Iwasa, and Yoshihisa Yamashita. Relationships  
491 of variations in the tongue microbiota and pneumonia mortality in nursing home residents.  
492 *The Journals of Gerontology: Series A*, oct 2017. doi: 10.1093/gerona/glx205. URL <https://doi.org/10.1093/gerona/glx205>.  
493
