# Aerodigestive sampling reveals altered microbial exchange between lung, oropharyngeal, and gastric microbiomes in children with impaired swallow function

Claire Duvallet<sup>1,2</sup>, Kara Larson<sup>3</sup>, Scott Snapper<sup>4</sup>, Sonia Iosim<sup>3</sup>, Ann Lee<sup>4</sup>, Katherine Freer<sup>4</sup>, Kara May<sup>5</sup>, Eric Alm<sup>1,2</sup>, and Rachel Rosen<sup>3,\*</sup>

<sup>1</sup>Department of Biological Engineering, MIT, Cambridge, Massachusetts

<sup>2</sup>Center for Microbiome Informatics and Therapeutics, MIT, Cambridge, Massachusetts

<sup>3</sup>Aerodigestive Center, Division of Gastroenterology, Hepatology and Nutrition, Boston Children's Hospital, Boston, Massachusetts

<sup>4</sup>Division of Gastroenterology, Hepatology and Nutrition, Boston Children's Hospital, Boston, Massachusetts

<sup>5</sup>Division of Pulmonary Medicine, Boston Children's Hospital, Boston, Massachusetts

\*Corresponding author

## 1 Abstract

### 2 1.1 Background

3 Children with oropharyngeal dysphagia have impaired airway protection mechanisms and are at  
4 higher risk for pneumonia and other pulmonary complications. Aspiration of gastric contents is  
5 often implicated as a cause for these pulmonary complications, despite being supported by little  
6 evidence. The goal of this study is to determine the relative contribution of oropharyngeal and  
7 gastric microbial communities to perturbations in the lung microbiome of children with and without  
8 oropharyngeal dysphagia and aspiration.

### 9 1.2 Methods

10 We conducted a prospective cohort study of 220 patients consecutively recruited from a tertiary  
11 aerodigestive center undergoing simultaneous esophagogastroduodenoscopy and flexible bronchoscopy.  
12 Bronchoalveolar lavage, gastric and oropharyngeal samples were collected from all recruited patients  
13 and 16S sequencing was performed. A subset of 104 patients also underwent video fluoroscopic

14 swallow studies to assess swallow function and were categorized as aspiration/no aspiration. To  
15 ensure the validity of the results, we compared the microbiome of these aerodigestive patients to the  
16 microbiome of pediatric patients recruited to a longitudinal cohort study of children with suspected  
17 GERD; patients recruited to this study had oropharyngeal, gastric and/or stool samples available.  
18 The relationships between microbial communities across the aerodigestive tract were described by  
19 analyzing within- and between-patient beta diversities and identifying taxa which are exchanged  
20 between aerodigestive sites within patients. These relationships were then compared in patients  
21 with and without aspiration to evaluate the effect of aspiration on the aerodigestive microbiome.

### 22 **1.3 Results**

23 Within all patients, lung, oropharyngeal and gastric microbiomes overlap. The degree of similarity  
24 is the lowest between the oropharynx and lungs (median Jensen-Shannon distance (JSD) = 0.90),  
25 and as high between the stomach and lungs as between the oropharynx and stomach (median JSD  
26 = 0.56 for both;  $p = 0.6$ ). Unlike the oropharyngeal microbiome, lung and gastric communities  
27 are highly variable across people and driven primarily by person rather than body site. In patients  
28 with aspiration, the lung microbiome more closely resembles oropharyngeal rather than gastric  
29 communities and there is greater prevalence of microbial exchange between the lung and oropharynx  
30 than between gastric and lung sites ( $p = 0.04$  and  $4 \times 10^{-5}$ , respectively).

### 31 **1.4 Conclusions**

32 The gastric and lung microbiomes display significant overlap in patients with intact airway protec-  
33 tive mechanisms while the lung and oropharynx remain distinct. In patients with impaired swal-  
34 low function and aspiration, the lung microbiome shifts towards oropharyngeal rather than gastric  
35 communities. This finding may explain why antireflux surgeries fail to show benefit in pediatric  
36 pulmonary outcomes.

### 37 **1.5 Key words**

38 Aerodigestive microbiomes; respiratory, oral, and gastric microbiomes; gastroesophageal reflux;  
39 impedance; aspiration; video fluoroscopic swallow study

## 40 **2 Introduction**

41 The economic and social impact of oropharyngeal dysfunction and aspiration is well known in the  
42 adult stroke population; adults with oropharyngeal dysfunction are at greater risk of pneumonia  
43 than those without [1]. Little is known about aspiration-related lung disease in children, though  
44 recent studies suggest that up to 10% of all pneumonia hospitalizations in pediatrics are related  
45 to aspiration [2]. Clinicians often assume these pneumonias result from the aspiration of refluxed  
46 gastric contents and frequently treat these children with antireflux surgery, fundoplication [3, 4].  
47 Despite this common surgical practice [5, 6], there are no pediatric studies which conclusively show  
48 improved pulmonary outcomes after fundoplication, suggesting that the respiratory symptoms seen

49 in aspirating patients may not be related to aspiration of gastric contents [7, 8, 9, 10, 11]. An  
50 alternative hypothesis is that aspiration-related respiratory symptoms may result from aspirated  
51 oropharyngeal contents. To test this hypothesis, we determined the microbial signatures of the  
52 lungs, stomach, and oropharynx in children with and without oropharyngeal dysphagia (i.e. with  
53 and without impaired airway protective mechanisms) to determine the relative contributions of the  
54 oropharyngeal and gastric microbiomes to the lung microbiome. We quantified the relationships  
55 between communities both within and across patients by calculating the beta diversity between  
56 samples and by defining individual OTUs exchanging between sites in multiple patients.

57 Previous studies have shown that the mouth, upper respiratory tract, and lung microbiota contain  
58 similar microbes, and that upstream oral communities seed downstream sites (e.g. lungs and stom-  
59 ach) [12, 13, 14]. However, there is little consensus on whether there exists a distinct or “core” lung  
60 microbiome that is consistent across people [13, 15, 16, 17]. Most studies, however, agree that the  
61 lung microbial communities share taxa with the oral microbiome, but that there are some bacteria  
62 present in lung communities whose abundances cannot be traced solely to the mouth [12, 13, 16, 18].

63 While the importance of oropharyngeal flora in seeding the lungs has been heavily studied in ICU  
64 settings [19, 20, 21], the role of oropharyngeal-lung flora exchange in otherwise healthy children with  
65 isolated swallowing dysfunction is unknown. Furthermore, studies investigating the relationships  
66 between microbial communities across the aerodigestive tract have not examined how microbes  
67 exchange between the stomach and lungs, and how this exchange relates to clinical factors such as  
68 aspiration and gastroesophageal reflux.

69 If the lung microbiome of aspirating patients exhibits more exchange with the oropharynx than  
70 the stomach, this could provide evidence for why anti-reflux surgery is not helpful in patients with  
71 aspiration-related respiratory symptoms. Furthermore, a shift in the lung microbial communities  
72 toward an oropharyngeal population could not only result in overt pneumonia but may also have more  
73 subtle, pro-inflammatory effects [22]. Finally, if there is a unique aerodigestive microbial signature  
74 in aspirating patients, microbial profiling may be helpful as a diagnostic tool for oropharyngeal  
75 dysphagia or in follow-up validation cohorts to identify subsets of patients who may be at higher  
76 risk for pneumonia.

## 77 **3 Methods**

### 78 **3.1 Patient cohort and sample collection**

79 We conducted a prospective cross sectional cohort study of children ages 1–18 undergoing bron-  
80 choscopy and esophagogastroduodenoscopy (EGD) for the evaluation of chronic cough. Patients  
81 with gastrostomy or nasogastric tubes, a history of gastrointestinal surgery, or antibiotic use at the  
82 time of sample acquisition were excluded. The study was approved by the Boston Children’s Hospital  
83 Institutional Review Board and informed consent was obtained from all patients/parents. Informa-  
84 tion about the patient demographics and symptoms are included in Table 1 and Supplementary  
85 Table 1.

86 We first performed brushing of the posterior tongue to obtain oropharyngeal samples, placing  
87 the brush in TE buffer at -80C. Second, the bronchoscopy and bronchoalveolar lavage (BAL) was

88 performed through an endotracheal tube in distal airways of the right middle lung or the most  
89 visually inflamed lung. Finally, gastric sampling was performed during the EGD. The endoscope was  
90 advanced, without suctioning, immediately into the stomach where the gastric fluid was suctioned  
91 into a sterile leukitrap. A minimum of 1 cc of gastric and lung fluid were collected and transferred  
92 to -80C.

93 All patients undergoing bronchoscopy had a triad of samples collected: oropharynx, gastric fluid,  
94 and BAL (Table 2 and Supplementary Table 2) [14]. To contextualize our findings, we also compared  
95 the aerodigestive microbiome of pediatric patients with suspected GERD who had oropharyngeal,  
96 gastric and/or stool microbiome samples collected. Additionally, many of the BAL samples were  
97 unable to be sequenced due to low DNA content. Thus, not all 220 patients have sequencing data  
98 for the same combination of samples. Tables with additional information describing the samples  
99 collected from each patient and which samples were used in each analysis are available at [https://github.com/cduvallet/aspiration-analysis-public/final/supp\\_files](https://github.com/cduvallet/aspiration-analysis-public/final/supp_files).  
100

### 101 **3.2 Multichannel intraluminal impedance with pH (pH-MII)**

102 A subset of patients had pH-MII testing at the discretion of the patient's primary gastroenterolo-  
103 gist. Acid reflux episodes were defined as episodes detected by the impedance (MII) sensors with  
104 associated drop in pH to  $< 4$ ; non-acid episodes did not have the associated drop. The percentage  
105 of time that reflux was in the proximal/distal esophagus was calculated by dividing the sum of the  
106 bolus clearance times in the proximal/distal esophagus by the total study duration. The percentage  
107 of full column reflux events was defined as the percentage of the total reflux events that reached the  
108 proximal two impedance sensors (i.e., the proximal most impedance channel) [23].

### 109 **3.3 Oropharyngeal dysphagia assessment**

110 A subset of the patients included in this study had a videofluoroscopic swallow study (VFSS) to  
111 assess swallow function and were divided into two groups (normal swallow function and aspira-  
112 tion/penetration). Because patients with penetration on VFSS have similar pulmonary symptoms  
113 and respond similarly to thickening as patients that aspirate, we included patients with aspiration  
114 and penetration in one group.

### 115 **3.4 Sample processing and sequencing**

116 Oropharyngeal swabs, BAL, and gastric fluid samples suspended in Tris-Saline buffer were cen-  
117 trifuged for 3 minutes at 10,000 rcf prior to DNA isolation. DNA was extracted from the sample  
118 pellet with the Qiagen DNeasy PowerSoil Kit as described by the manufacturer, with the following  
119 modifications: protein precipitation in one step using 100  $\mu$ L of each C2 and C3 solutions, and col-  
120 umn centrifugation at 10,000 rcf for 10 minutes. Library preparation and sequencing was performed  
121 in two batches at the Broad Institute. 515F and 806R primers were used to amplify a  $\sim$ 250bp region  
122 from the V4 region of the microbial 16S gene. Paired-end sequencing was performed on a MiSeq  
123 (175bp paired). Patients with multiple samples had all of their respective samples sequenced in the  
124 same batch.

### 125 3.5 Microbiome data processing and community analyses

126 Paired end reads were merged using USEARCH `-fastq_mergepairs` and truncated to 200 bp.  
127 Reads with more than 2 expected errors were discarded. Operational taxonomic units (OTUs) were  
128 clustered at 99% similarity and assigned taxonomy using the RDP classifier ( $c = 0.5$ ) [24]. All  
129 quality filtering and OTU calling steps were performed with an in-house pipeline  
130 ([https://github.com/thomasgurry/amplicon\\_sequencing\\_pipeline](https://github.com/thomasgurry/amplicon_sequencing_pipeline)).

131 Beta diversity was calculated with an in-house implementation of the Jensen-Shannon distance  
132 (JSD) [25], which is calculated by taking the square root of the Jensen-Shannon divergence. The  
133 Jensen-Shannon divergence is a measure of divergence between distributions accounting for both  
134 presence and abundances of organisms and which deals well with the compositionality of microbiome  
135 data; the square root of the Jensen-Shannon divergence converts this into a distance metric, which  
136 are the values we report here [25, 26]. JSD values close to 1 indicate that two communities are very  
137 different, while values close to 0 correspond to more similar communities. Although this metric has  
138 been used broadly in microbiome research [27, 28], we also include results with an alternative beta  
139 diversity metric, the Bray-Curtis distance, in the Supplementary Figures. Only samples which were  
140 sequenced in the same batch were considered in cross-patient comparisons. Differences in overall  
141 community structure across sites was assessed using the PERMANOVA test as implemented in  
142 `scikit-bio v 0.4.2 (skbio.stats.distance.permanova)`.

143 Alpha diversities were calculated on the raw OTU counts using Python’s `alph.shannon`, `alph.chao1`,  
144 and `alph.simpson` functions in `skbio.diversity.alpha`. Differential abundance analysis between  
145 aspirators and non-aspirators was performed on the relative abundances of OTUs and genera using a  
146 Kruskal-Wallis test implemented in Python’s `scipy.stats.mstats` module (function `kruskalwallis`,  
147 a non-parametric test and an implementation which accounts for ties [29]). P-values were corrected  
148 for multiple hypothesis testing with the `multipletests` function from `statsmodels.sandbox.stats.multicomp`,  
149 with the Benjamini/Hochberg correction (`method = 'fdr_bh'`). Corrections were performed sepa-  
150 rately for each aerodigestive site and taxonomic level.

### 151 3.6 Exchanged OTUs definition

152 To define exchanged OTUs, we used data from patients with all three sites sequenced ( $N = 66$ ). For  
153 each OTU, we calculated the Spearman partial correlation ( $\frac{r_{xy} - r_{xz}r_{zy}}{\sqrt{(1-r_{xz}^2)(1-r_{zy}^2)}}$ ) between its non-zero  
154 abundances in two sites, partialled on the third site (Scipy v 0.19.0 `stats.spearmanr`, [29]). P-  
155 values for each OTU were calculated as the percentage of null correlations larger than the observed  
156 correlation after shuffling abundances 2000 times. Only OTUs present in two sites in at least 10  
157 patients were considered. OTUs with FDR-corrected q-value  $< 0.1$  were defined as “exchanged”  
158 (`statsmodels.sandbox.stats.multicomp.multipletests` with `method='fdr_bh'`). To determine the statistical  
159 significance of the number of exchanged OTUs, we shuffled the patient IDs for each OTU in each  
160 site and re-defined “null” exchanged OTUs as described above.

### 161 **3.7 Random Forest classifiers**

162 We used Random Forest classifiers (scikit-learn v 0.18.1  
163 `ensemble.RandomForestClassifier` with `n_estimators=1000`) for all supervised machine learning  
164 analyses [30]. For the classifier used to distinguish between aerodigestive sites (Figure 3B), we used  
165 5-fold cross validation, ensuring that both samples from the same patient were in the same train or  
166 test split. For all other classifiers used to predict aspiration status, we performed a leave-one-out  
167 analysis. For each sample, we trained a model on all the other samples and used that model to  
168 predict the left-out sample's label and label probability. Areas under the ROC curve (AUCs) and  
169 Fisher-p-values were calculated based on these leave-one-out predictions using the `roc_curve`, `auc`,  
170 and `confusion_matrix` functions from Python's `sklearn.metrics` module [30].

### 171 **3.8 Availability of data and materials**

172 Code to reproduce the analyses presented here are available at [www.github.com/cduvallet/aspiration-](http://www.github.com/cduvallet/aspiration-analysis-public)  
173 `analysis-public`. The 16S sequencing data used in this study are available in the SRA repository at  
174 accession number SRP141148 and clinical metadata are available upon request from the correspond-  
175 ing author.

## 176 **4 Results**

177 Two hundred and twenty patients were included in the analysis (Tables 1 and 2; Supplementary  
178 Tables 1 and 2). The mean age of the patients was  $7.4 \pm 5.5$  years. One hundred and nine out  
179 of 220 patients were taking proton pump inhibitors at the time of sampling. One hundred and  
180 four patients had a videofluoroscopic swallow study of which 47 (45%) had evidence of aspiration  
181 or penetration and 57 (55%) had normal swallow function. Of the 47 patients with aspiration or  
182 penetration, 26 patients had aspiration and 21 patients had isolated penetration. Of the patients  
183 with aspiration, 50% (n=13) aspirated thin liquids alone, 26.9% (n=7) aspirated thin and nectar  
184 consistency, 15.4% (n=4) aspirated thin, nectar and honey consistency and 7.7% (n=2) aspirated  
185 all textures including purees. Twenty eight patients had pH-MII testing for gastroesophageal reflux  
186 at the time of sample collection. No relevant symptoms or clinical outcomes were significantly  
187 associated with aspiration status (Supplementary Table 1).

### 188 **4.1 Aerodigestive microbiome across people**

189 At the genus level, pediatric aerodigestive communities share many predominant members, including  
190 *Streptococcus*, *Prevotella*, *Haemophilus*, *Veillonella*, and *Neisseria* (Figure 1). However, despite  
191 genus-level similarities, OTU-level aerodigestive communities are distinct and highly variable across  
192 people. The overall community composition was significantly different between sites (PERMANOVA  
193 on JSDs between BAL, gastric fluid, and oropharyngeal samples in the two sequencing batches  
194 separately,  $p < 0.001$ , Figure 2A). Furthermore, lung communities were very different across people  
195 (median lung-lung JSD = 0.87) while oropharyngeal communities tended to be more similar (median  
196 oropharyngeal-oropharyngeal JSD = 0.59, Figure 2B).

## 197 4.2 Aerodigestive microbiome within people

198 We compared aerodigestive communities within patients who had multiple sites sequenced (Table 2,  
199 Figure 3). Oropharyngeal and gastric fluid communities are similar within patients (median JSD =  
200 0.56), reflecting that the mouth seeds the gastric microbiome [12, 13]. The majority of patients had  
201 very different lung and oropharyngeal communities (median JSD = 0.90), and these differences were  
202 significantly higher than either the lung-gastric fluid or gastric fluid-oropharyngeal beta diversities  
203 ( $p < 1 \times 10^{-8}$ , Figure 3A). Surprisingly, lung and stomach communities were as similar to each other  
204 as stomach and oropharyngeal communities (median JSD = 0.56 for both comparisons,  $p = 0.6$ ).

205 We next identified specific microbes which exchange between aerodigestive sites within people.  
206 To do this, we reasoned that an actively exchanging microbe's abundances in two sites should be  
207 correlated across patients (Supplementary Figure 2 and Methods). In other words, if an OTU is  
208 exchanged between two sites, if we observe that its abundance is low in both sites of one patient  
209 and high abundance in one site of another patient, then we would expect that its abundance in the  
210 second site of that second patient will also be high. We identified 13 OTUs exchanged between lung  
211 and oropharyngeal, 76 between gastric fluid and lung, and 117 between oropharyngeal and gastric  
212 fluid communities. These results were statistically significant: we found a maximum of 2 exchanged  
213 OTUs between sites in our null analysis. The low number of directly exchanged OTUs between  
214 the oropharynx and lungs supports the finding that these sites are more distinct than others in  
215 the aerodigestive tract. The lungs and stomach exchange fewer OTUs than the oropharynx and  
216 stomach even though they have comparable intra-patient similarities, suggesting that factors other  
217 than specific bacterial exchange contributes to the similarity between lungs and stomachs within  
218 patients.

219 Random Forest classifiers trained to distinguish between sites (ensuring that samples from the  
220 same patient were in the same train/test set) were able to identify a generalizable oropharyngeal  
221 microbial signature that distinguishes the oropharynx from other sites across people (AUC = 0.95  
222 for both gastric fluid and lung comparisons, Figure 3B). Interestingly, when we compared within-  
223 patient similarities across sites to across-patient similarities for the same sites, we found that lung  
224 and stomach communities within patients were more similar than lungs across patients and than  
225 stomachs across patients (Figure 4,  $p < 1 \times 10^{-7}$ , Supplementary Table 3). Thus, while there  
226 exists a "core" oropharyngeal microbiome across people, lung and gastric communities are more  
227 variable and driven primarily by the person rather than body site. These results challenge the  
228 prevailing hypothesis that human-associated microbial communities are primarily driven by body  
229 habitat and instead suggest that patient-specific relationships may be equally, if not more, important  
230 in determining community structure in the aerodigestive microbiome [31, 32, 33].

## 231 4.3 Aspiration modulates the relationship between lung and oropharyn- 232 geal microbiomes but not the lung and stomach

233 Next, we investigated the impact of oropharyngeal dysphagia and aspiration on the aerodigestive  
234 microbiome. To assess whether there were large-scale differences in the microbiomes of aspirators  
235 and non-aspirators, we compared the alpha diversity for each aerodigestive site between these patient  
236 groups. Aspirators did not have significantly different alpha diversity in any of the aerodigestive sites



237 for any of the metrics we compared (Supplementary Figure 3). Next, we attempted to identify indi-  
238 vidual OTUs which were differentially abundant between aspirators and non-aspirators. No OTUs  
239 or genera were significant in any aerodigestive site after correcting for multiple tests (Supplementary  
240 Table 4).

241 We next leveraged our within-patient sampling to investigate the effect of aspiration on the  
242 relationships between sites in the aerodigestive tract. Aspirators had significantly more similar lung  
243 and oropharyngeal communities than non-aspirators (Figure 5A,  $p = 0.04$ ) and were much more likely  
244 to have the pre-defined oropharyngeal-lung microbes in both their oropharynx and lungs than non-  
245 aspirators ( $p = 4 \times 10^{-5}$ ) (Figure 5B). Lung-oropharynx exchanged OTUs co-occurred in a median of  
246 40% of aspirators' lung and oropharyngeal communities but only 17% of non-aspirators'. Aspirators  
247 were not more likely to have stomach-lung microbes present in both the lungs and gastric fluid than  
248 non-aspirators (Figure 4B,  $p = 0.5$ ), and lung and gastric communities of aspirating patients were  
249 not necessarily more similar to each other than those of non-aspirating patients (Figure 4A,  $p =$   
250 0.6).

251 To identify potential microbial biomarkers of aspiration, we looked at the exchanged OTUs which  
252 were most frequently present in the lung and oropharyngeal communities of aspirators relative to  
253 non-aspirators. In the oropharyngeal-lung exchanged OTUs, these were an unknown OTU in the  
254 *Flavobacteriaceae* family, OTUs in the *Fusobacterium*, *Rothia*, *Veillonella* genera, and an unknown  
255 OTU in the *Prevotellaceae* family, among others (Table 3, gastric-lung OTUs in Supplementary  
256 Table 5).

257 We used Random Forest classifiers trained on the presence of exchanged OTUs in different  
258 sites and on the entire aerodigestive communities in order to test their potential as diagnostics for  
259 aspiration. We evaluated these classifiers by calculating the Fisher's exact p-values and the area  
260 under the ROC curve (AUC) on leave-one-out predictions, where an AUC of 1.0 indicates a perfect  
261 classifier and an AUC of 0.5 is a classifier which assigns labels randomly [34]. The concordant  
262 presence or absence of exchanged OTUs in the two sites slightly improved classifiers based on the  
263 oropharyngeal-lung OTUs but not the ones based on the lung-gastric OTUs, relative to classifiers  
264 based on the presence of the exchanged OTUs in either site alone (Table 4; classifiers trained on  
265 the abundance of exchanged OTUs presented in Supplementary Table 6). However, these marginal  
266 results suggest that additional work will be necessary to develop these exchanged OTUs into reliable  
267 diagnostic biomarkers.

268 Using Random Forest classifiers trained on the entire microbiomes, we found that combining the  
269 oropharynx and lung communities resulted in a better classifier than either community alone (Table  
270 6). Surprisingly, the classifiers trained on oropharyngeal and gastric communities performed well,  
271 despite our expectation that aspiration-induced changes in the microbiome would manifest in the  
272 lungs rather than the oropharynx or stomach. We confirmed that the patients' aspiration status  
273 was not confounded with proton pump inhibitor usage (Fisher exact p-value = 0.8, Supplementary  
274 Table 1), but there may be other co-morbidities or unmeasured confounders that could be driving  
275 the differences detected in these communities. However, taken together, these results suggest that  
276 identifying a biomarker for aspiration based on bacteria in both the lungs and oropharynx may be  
277 possible, and that these two sites together contain more information about a patient's aspiration  
278 status than either site alone.



#### 279 4.4 Reflux may impact the relationship between lung and stomach mi- 280 crobiomes

281 Reflux profiles for the 28 patients are shown in Table 6. The percent of full column, distal, and  
282 proximal reflux were slightly negatively correlated with gastric-lung JSD, indicating that patients  
283 with more frequent reflux may have more similar gastric and lung microbial communities (Figure  
284 6). However, the large range of gastric-lung JSDs across all patients and relatively weak correlation  
285 suggests that other non-reflux factors likely contribute more to the similarities between gastric  
286 and lung communities that are observed across all people. Similarly, we were not able to identify  
287 relationships between gastric-lung JSD and PPI usage (Supplementary Figures 9 and 10).

## 288 5 Discussion

289 In this study, we characterized the relationships between the oropharyngeal, lung, and gastric mi-  
290 crobiomes in a large pediatric cohort with and without swallowing dysfunction. Leveraging our  
291 simultaneous sampling of multiple sites per patient, we find that there exists a “core” oropharyngeal  
292 microbiome across patients, but lung and gastric communities vary and are distinct to individuals.  
293 Within patients, lung and oropharyngeal communities remain most distinct. We show for the first  
294 time that in patients with impaired swallowing, the lung microbiome shifts toward oropharyngeal  
295 flora rather than gastric flora. Our results also suggest that identifying biomarkers for aspiration  
296 based on the presence of certain bacteria in both the lungs and oropharynx may ultimately be  
297 possible.

298 There are several limitations to our study. First, because it is unethical to perform bronchoscopies  
299 on healthy children, our patients in this study had respiratory symptoms. Furthermore, these pa-  
300 tients were on variety of medications (Table 1), which may affect microbial community compositions  
301 and relationships. However, we believe that our patient population represents patients typically seen  
302 in aerodigestive centers and that understanding the degree of microbial exchange is most clinically  
303 relevant in patients with symptoms. The microbial populations we found in this study are similar to  
304 those of previously published studies of both healthy and symptomatic adults which reinforces the  
305 validity of our results [12, 13, 17, 18]. We also confirmed that medication use and symptoms were  
306 not confounded with aspiration status (Supplementary Table 1). Second, the number of patients  
307 undergoing pH-MII testing was relatively small which limits our conclusions about the impact of gas-  
308 troesophageal reflux on the lung. However, our study raises enough concerns about the significance  
309 of oropharyngeal-lung exchange in children with impaired swallowing that gastroesophageal reflux  
310 should not be considered as the primary source of microbial exchange causing pulmonary symp-  
311 toms. Third, the diagnosis of oropharyngeal dysphagia in this study was based on VFSS. While  
312 this only categorizes patients based on a “one-point-in-time” study, it is the gold standard test to  
313 diagnose oropharyngeal dysphagia in children and therefore we feel it is appropriate for use in this  
314 study. Finally, the low biomass of BAL and gastric fluid samples could lead to sequencing artifacts  
315 or contamination. We did not explicitly remove potential background environmental or sampling  
316 sequences from our data, though our sampling methods was carefully developed in order to minimize  
317 potential contaminants [12, 16]. The low biomass of BAL and gastric fluid samples also resulted

318 in fewer total sequencing reads than the oropharyngeal swabs (Supplementary Figure 11), perhaps  
319 contributing partially to the high variability we observed between these communities. However,  
320 many of our conclusions depend upon within-patient analyses, which reduce spurious results.

321 Despite these limitations, our findings have broad clinical implications for the understanding  
322 and treatment of oropharyngeal dysphagia with resultant aspiration. Our clinical finding that the  
323 lung microbiome in children with aspiration shifts toward the oropharynx rather than the stomach  
324 highlights the importance of understanding the primary driver of microbial exchange so that ther-  
325 apies can be tailored accordingly. For example, if the mechanism of lung symptoms and disease in  
326 aspirating children results from a microbial shift towards oropharyngeal flora, anti-reflux surgery  
327 will be of no benefit to preventing oropharyngeal-lung exchange. Instead, therapies may need to be  
328 tailored to focused on changing oropharyngeal flora or salivary properties.

329 While there are no existing pediatric microbiome studies of the aerodigestive microbiome in pa-  
330 tients with dysphagia, there is evidence that children with oropharyngeal dysphagia are predisposed  
331 to pneumonia and that this could be due to increased aspiration of microbes from the oral micro-  
332 biome. In a study of 382 children undergoing VFSS, evidence of aspiration predicted pneumonia  
333 risk, though the causative organisms for these pneumonias were not known [35]. In cohort of elderly  
334 aspirating patients, oral colonization by respiratory pathogens was associated with increased risk  
335 of pneumonia, highlighting the potential importance of oral flora in influencing the lung outcomes  
336 [36]. Finally, a previous study of healthy adults found that individuals with oropharyngeal bacteria  
337 in their lungs had increased evidence of inflammatory metabolomic signals, suggesting that even a  
338 change of lung flora to commensal oropharyngeal bacteria can trigger inflammation even in healthy  
339 patients [22]. Our results add to these findings and suggest that changes in the lung microbiome  
340 towards oropharyngeal flora merit additional study to determine if these shifts result in increased  
341 morbidity or worse clinical outcomes, including the development of pneumonia.

342 From a microbial perspective, we identified bacterial families and genera that are more commonly  
343 exchanged between the oropharynx and lungs of children that aspirate than of children with intact  
344 swallowing mechanism. While there are no other 16S sequencing studies determining aspiration  
345 pneumonia risk in children, there is evidence from the adult literature that similar bacteria are  
346 involved in aspiration pneumonia risk. For example, oropharyngeal *Streptococci* were found to be  
347 more abundant in the lungs of adults with pneumonia and aspiration risk factors than without  
348 aspiration risk [37]. In a study of 173 adults in long term care facilities, patients with oropharyngeal  
349 *Prevotella* and *Veillonella* had increased risk of death from pneumonia compared to patients who had  
350 oropharyngeal *Neisseria* and *Fusobacterium* [38]. Our study is a critical first step toward identifying  
351 bacteria present in the oropharynx and lungs of aspirating children that may result in higher risk  
352 for pneumonias, with additional studies needed to determine their impact on pediatric outcomes.

353 In summary, our findings suggest that interventions to reduce aspiration-related respiratory com-  
354 plications due to increased microbial exchange should target aspiration from the oropharynx rather  
355 than the stomach. This microbial data supports the clinical observation that antireflux surgery fails  
356 to prevents pulmonary complications such as pneumonias or hospitalizations [3, 7, 8, 9, 10, 11].  
357 By simultaneously sampling multiple sites per patient, we show that the lung and stomach micro-  
358 biomes are highly variable across patients and determined primarily by patient rather than body  
359 site. If aerodigestive microbial communities are indeed specific to each individual, interventions

360 targeting the aerodigestive microbiome may benefit from personalized medicine approaches. Finally,  
361 understanding the relationships between aerodigestive communities in aspirating and non-aspirating  
362 patients provides insight into the potential pathophysiology behind aspiration-related respiratory  
363 outcomes and suggests potential diagnostics and therapeutics for future investigation.

## 364 **6 Declarations**

### 365 **6.1 Acknowledgments**

366 We thank Scott Olesen and Manu Kumar for helpful discussions on statistical analyses, and Nathaniel  
367 Chu and members of the Alm lab for helpful discussions on presenting and visualizing the results.

### 368 **6.2 Funding**

369 This work was supported by NIH R01 DK097112 (R.R.), the Boston Children’s Hospital Transla-  
370 tional Research Program (R.R.), and the North American Society for Pediatric Gastroenterology,  
371 Hepatology and Nutrition Grant for Diseases of the Upper Gastrointestinal Tract (R.R.). Com-  
372 putational resources for this work were supported by the Center for Microbiome Informatics and  
373 Therapeutics (E.A.). C.D. acknowledges support through the National Defense Science & Engineer-  
374 ing Graduate Fellowship (NDSEG).

### 375 **6.3 Author contributions**

376 R.R. designed the study, recruited patients, and performed the endoscopies. R.R. led patient re-  
377 cruitment. A.L. and S.I. assisted with patient recruitment. K.L. performed and interpreted the  
378 videofluoroscopic swallow studies. K.M. performed the bronchoscopies in this study. K.F. and S.S.  
379 performed the DNA isolation for 16S sequencing. C.D. processed and analyzed the microbiome data.  
380 C.D., E.A., and R.R. interpreted the results. C.D. and R.R. wrote the manuscript.

### 381 **6.4 List of abbreviations**

382 EGD: esophagogastroduodenoscopy  
383 BAL: bronchoalveolar lavage  
384 MII: multichannel intraluminal impedance  
385 VFSS: videofluoroscopic swallow study  
386 OTU: operational taxonomic unit  
387 JSD: Jensen-Shannon distance  
388 PERMANOVA: permutational multivariate analysis of variance  
389 AUC: area under the ROC (receiver operating characteristic) curve

390

## 391 7 Tables

| <b>Demographics</b>                       |                      |
|-------------------------------------------|----------------------|
| Gender                                    | 129 M, 91 F          |
| Age                                       | 7.4 ± 5.5 years      |
| <b>Symptom and quality of life scores</b> |                      |
| PGSQ symptom score                        | 0.9 ± 0.72 (N = 182) |
| PGSQ total score                          | 0.9 ± 0.69 (N = 179) |
| <b>Medications</b>                        |                      |
| Currently taking PPIs                     | 50% (109/220)        |
| Currently taking H2 blockers              | 18% (40/219)         |
| Current use of inhaled steroids           | 60% (133/220)        |
| <b>Symptoms within last 6 months</b>      |                      |
| Problem swallowing                        | 16% (35/197)         |
| Food stuck                                | 24% (52/197)         |
| Difficulty swallowing                     | 27% (60/198)         |
| Abdominal pain                            | 40% (88/205)         |
| Constipation                              | 32% (71/175)         |
| Weight loss                               | 21% (47/195)         |
| Food coming up                            | 39% (86/201)         |
| Chest pain                                | 25% (54/197)         |
| Chronic cough                             | 51% (112/166)        |
| <b>Infection history within 6 months</b>  |                      |
| History of pneumonia                      | 25% (54/206)         |
| Recent history of ear infection           | 20% (45/182)         |
| Recent history of sinus infection         | 20% (44/176)         |
| History of any recent antibiotics         | 29% (63/220)         |

Table 1: Patient demographics. While all patients were given questionnaires, not all patients completed the answers to all questions.

|                                            | Number of patients |
|--------------------------------------------|--------------------|
| BAL, gastric fluid, and oropharyngeal swab | 66                 |
| BAL and gastric fluid                      | 22                 |
| BAL and oropharyngeal swab                 | 7                  |
| Gastric fluid and oropharyngeal swab       | 45                 |
| Oropharyngeal swab and stool               | 20                 |
| BAL only                                   | 6                  |
| Gastric fluid only                         | 12                 |
| Oropharyngeal swab only                    | 37                 |
| Stool only                                 | 5                  |
| Total patients                             | 222                |

Table 2: Number of patients with each combination of body sites sequenced.

| Family             | Genus           | Non-aspirator | Aspirator | Difference |
|--------------------|-----------------|---------------|-----------|------------|
| Flavobacteriaceae  |                 | 8.7           | 48.0      | 39.3       |
| Fusobacteriaceae   | Fusobacterium   | 30.4          | 68.0      | 37.6       |
| Micrococcaceae     | Rothia          | 8.7           | 44.0      | 35.3       |
| Veillonellaceae    | Veillonella     | 26.1          | 60.0      | 33.9       |
| Prevotellaceae     |                 | 43.5          | 76.0      | 32.5       |
| Porphyromonadaceae | Porphyromonas   | 39.1          | 68.0      | 28.9       |
| Streptococcaceae   | Streptococcus   | 13.0          | 40.0      | 27.0       |
| Veillonellaceae    | Centipeda       | 8.7           | 32.0      | 23.3       |
| Prevotellaceae     | Prevotella      | 17.4          | 36.0      | 18.6       |
| Leptotrichiaceae   | Streptobacillus | 21.7          | 40.0      | 18.3       |
| Fusobacteriaceae   | Fusobacterium   | 17.4          | 32.0      | 14.6       |
| Aerococcaceae      | Abiotrophia     | 21.7          | 28.0      | 6.3        |
| Neisseriaceae      | Neisseria       | 17.4          | 20.0      | 2.6        |

Table 3: **Prevalence of lung-orpharynx exchanged OTUs.** Prevalence is calculated as the percentage of patients who have the OTU present in both their lungs and oropharynx, calculated separately among aspirators (N = 25) and non-aspirators (N = 23). OTUs are ordered by their differential prevalence in aspirators relative to non-aspirators, and are labeled with their family- and genus-level taxonomies. Blank genus names indicate OTUs which were not annotated at the genus level. A similar table for the lung-gastric exchange OTUs can be found in Supplementary Table 1.

| <b>Lung-orpharynx OTUs (13)</b> | AUC  | p    | N (non-asp/asp) |
|---------------------------------|------|------|-----------------|
| Lung                            | 0.66 | 0.08 | 33/33           |
| Oropharyngeal                   | 0.57 | 0.35 | 43/36           |
| Concordance                     | 0.63 | 0.05 | 23/25           |
| <b>Lung-gastric OTUs (76)</b>   |      |      |                 |
| Lung                            | 0.60 | 0.14 | 33/33           |
| Gastric fluid                   | 0.65 | 0.03 | 48/41           |
| Concordance                     | 0.53 | 1.0  | 28/29           |

Table 4: **Classifiers based on the presence of exchanged OTUs.** (Top) Classifiers built from the presence of lung-orpharynx exchanged OTUs. (Bottom) Classifiers built from the presence of lung-gastric exchanged OTUs. Rows indicate which microbial community was used to train each classifier. In the “concordance” classifiers, OTUs which were either present or absent in both sites were coded as 1 and OTUs which were present in one site but absent in the other were coded as 0. AUCs are calculated as the area under the ROC curve from leave-one-out predictions. Fisher’s exact p values are calculated on the leave-one-out predictions. Similar classifiers built from the abundance of exchanged OTUs are shown in Supplementary Table 6.

| Sites                                | AUC  | Fisher p-value | N (non-asp/asp) |
|--------------------------------------|------|----------------|-----------------|
| Lung                                 | 0.63 | 0.32           | 33/33           |
| Oropharyngeal swab                   | 0.69 | 0.02           | 43/36           |
| Gastric fluid                        | 0.66 | 0.08           | 48/41           |
| Lung and oropharyngeal swab          | 0.79 | 0.01           | 23/25           |
| Lung and gastric fluid               | 0.66 | 0.02           | 28/29           |
| Oropharyngeal swab and gastric fluid | 0.73 | 0.003          | 35/32           |
| All three sites                      | 0.78 | 0.01           | 19/23           |

Table 5: **Classifiers based on perturbed relationship between lung and oropharyngeal microbiota can distinguish aspirators from non-aspirators.** Areas under the ROC curve (AUC) and Fisher p-values calculated from classifiers trained on the entire microbial communities. Each row is a different classifier based on different combinations of aerodigestive communities, indicated in the “Sites” column. In the multi-site classifiers, the abundances of OTUs in different sites were used as separate features. AUCs and Fisher’s p values were calculated from the leave-one-out predictions for each sample.

|                                 | Mean (std)  |
|---------------------------------|-------------|
| Number of acid episodes         | 23.1 (25.5) |
| Number of nonacid episodes      | 15.4 (16.4) |
| Number of pH only episodes      | 16.3 (12.5) |
| Number of total reflux episodes | 38.0 (32.4) |
| Percent time proximal reflux    | 0.48 (0.46) |
| Percent time distal reflux      | 1.3 (1.1)   |
| Percent time pH < 4             | 5.4 (5.2)   |
| Number abnormal by pH-metry     | 9/28        |
| Number abnormal by MII          | 3/28        |

Table 6: Reflux characteristics for 28 patients measured by pH-MII.



## References

- 392
- 393 [1] M. A. Holas, K. L. DePippo, and M. J. Reding. Aspiration and relative risk of medi-  
394 cal complications following stroke. *Archives of Neurology*, 51(10):1051–1053, oct 1994. doi:  
395 10.1001/archneur.1994.00540220099020. URL [https://doi.org/10.1001/archneur.1994.](https://doi.org/10.1001/archneur.1994.00540220099020)  
396 [00540220099020](https://doi.org/10.1001/archneur.1994.00540220099020).
- 397 [2] J. Thomson, M. Hall, L. Ambroggio, B. Stone, R. Srivastava, S. S. Shah, and J. G. Berry.  
398 Aspiration and non-aspiration pneumonia in hospitalized children with neurologic impairment.  
399 *Pediatrics*, 137(2):e20151612–e20151612, jan 2016. doi: 10.1542/peds.2015-1612. URL <https://doi.org/10.1542/peds.2015-1612>.  
400 [//doi.org/10.1542/peds.2015-1612](https://doi.org/10.1542/peds.2015-1612).
- 401 [3] Tim Jancelewicz, Monica E. Lopez, Cynthia D. Downard, Saleem Islam, Robert Baird, Shawn J.  
402 Rangel, Regan F. Williams, Meghan A. Arnold, Dave Lal, Elizabeth Renaud, Julia Grabowski,  
403 Roshni Dasgupta, Mary Austin, Julia Shelton, Danielle Cameron, and Adam B. Goldin. Surgi-  
404 cal management of gastroesophageal reflux disease (GERD) in children: A systematic review.  
405 *Journal of Pediatric Surgery*, 52(8):1228–1238, aug 2017. doi: 10.1016/j.jpedsurg.2016.09.072.  
406 URL <https://doi.org/10.1016/j.jpedsurg.2016.09.072>.
- 407 [4] M. S. Lasser, J. G. Liao, and R. S. Burd. National trends in the use of antireflux procedures  
408 for children. *PEDIATRICS*, 118(5):1828–1835, nov 2006. doi: 10.1542/peds.2006-1185. URL  
409 <https://doi.org/10.1542/peds.2006-1185>.
- 410 [5] L. Dupree Hatch, Theresa A. Scott, William F. Walsh, Adam B. Goldin, Martin L. Blakely,  
411 and Stephen W. Patrick. National and regional trends in gastrostomy in very low birth weight  
412 infants in the USA: 2000–2012. *Journal of Perinatology*, 38(9):1270–1276, jun 2018. doi: 10.  
413 1038/s41372-018-0145-4. URL <https://doi.org/10.1038/s41372-018-0145-4>.
- 414 [6] Adam B. Goldin, Michelle Garrison, and Dimitri Christakis. Variations between hospitals  
415 in antireflux procedures in children. *Archives of Pediatrics & Adolescent Medicine*, 163  
416 (7):658, jul 2009. doi: 10.1001/archpediatrics.2009.103. URL [https://doi.org/10.1001/](https://doi.org/10.1001/archpediatrics.2009.103)  
417 [archpediatrics.2009.103](https://doi.org/10.1001/archpediatrics.2009.103).
- 418 [7] Douglas C. Barnhart, Matthew Hall, Sanjay Mahant, Adam B. Goldin, Jay G. Berry, Roger G.  
419 Faix, J. Michael Dean, and Rajendu Srivastava. Effectiveness of fundoplication at the time of  
420 gastrostomy in infants with neurological impairment. *JAMA Pediatrics*, 167(10):911, oct 2013.  
421 doi: 10.1001/jamapediatrics.2013.334. URL [https://doi.org/10.1001/jamapediatrics.](https://doi.org/10.1001/jamapediatrics.2013.334)  
422 [2013.334](https://doi.org/10.1001/jamapediatrics.2013.334).
- 423 [8] Steven L. Lee, Hooman Shabatian, Jin-Wen Hsu, Harry Applebaum, and Philip I. Haigh. Hospi-  
424 tal admissions for respiratory symptoms and failure to thrive before and after nissen fundoplica-  
425 tion. *Journal of Pediatric Surgery*, 43(1):59–65, jan 2008. doi: 10.1016/j.jpedsurg.2007.09.020.  
426 URL <https://doi.org/10.1016/j.jpedsurg.2007.09.020>.
- 427 [9] A. B. Goldin, R. Sawin, K. D. Seidel, and D. R. Flum. Do antireflux operations decrease the  
428 rate of reflux-related hospitalizations in children? *Pediatrics*, 118(6):2326–2333, dec 2006. doi:  
429 10.1542/peds.2006-2212. URL <https://doi.org/10.1542/peds.2006-2212>.

- 430 [10] Jennifer Yeh, Sharon A. McGrath-Morrow, and Joseph M. Collaco. Oxygen weaning after  
431 hospital discharge in children with bronchopulmonary dysplasia. *Pediatric Pulmonology*, 51(11):  
432 1206–1211, apr 2016. doi: 10.1002/ppul.23442. URL <https://doi.org/10.1002/ppul.23442>.
- 433 [11] R. Srivastava, E. C. Downey, M. O’Gorman, P. Feola, M. Samore, R. Holubkov, M. Mundorff,  
434 B. C. James, P. Rosenbaum, P. C. Young, and J. M. Dean. Impact of fundoplication versus  
435 gastrojejunal feeding tubes on mortality and in preventing aspiration pneumonia in young  
436 children with neurologic impairment who have gastroesophageal reflux disease. *PEDIATRICS*,  
437 123(1):338–345, 2009. doi: 10.1542/peds.2007-1740. URL [https://doi.org/10.1542/peds.  
438 2007-1740](https://doi.org/10.1542/peds.2007-1740).
- 439 [12] Christine M. Bassis, John R. Erb-Downward, Robert P. Dickson, Christine M. Freeman,  
440 Thomas M. Schmidt, Vincent B. Young, James M. Beck, Jeffrey L. Curtis, and Gary B. Huff-  
441 nagle. Analysis of the upper respiratory tract microbiotas as the source of the lung and gastric  
442 microbiotas in healthy individuals. *mBio*, 6(2):e00037–15, 2015. doi: 10.1128/mbio.00037-15.  
443 URL <https://doi.org/10.1128%2Fmbio.00037-15>.
- 444 [13] Emily S. Charlson, Kyle Bittinger, Andrew R. Haas, Ayannah S. Fitzgerald, Ian Frank, Anjana  
445 Yadav, Frederic D. Bushman, and Ronald G. Collman. Topographical continuity of bacterial  
446 populations in the healthy human respiratory tract. *American Journal of Respiratory and  
447 Critical Care Medicine*, 184(8):957–963, 2011. doi: 10.1164/rccm.201104-0655oc. URL [https:  
448 //doi.org/10.1164%2Frccm.201104-0655oc](https://doi.org/10.1164%2Frccm.201104-0655oc).
- 449 [14] Rachel Rosen, Lan Hu, Janine Amirault, Umakanth Khatwa, Doyle V. Ward, and Andrew  
450 Onderdonk. 16s community profiling identifies proton pump inhibitor related differences in  
451 gastric, lung, and oropharyngeal microflora. *The Journal of Pediatrics*, 166(4):917–923, apr  
452 2015. doi: 10.1016/j.jpeds.2014.12.067. URL [https://doi.org/10.1016/j.jpeds.2014.12.  
453 067](https://doi.org/10.1016/j.jpeds.2014.12.067).
- 454 [15] Arvind Venkataraman, Christine M. Bassis, James M. Beck, Vincent B. Young, Jeffrey L.  
455 Curtis, Gary B. Huffnagle, and Thomas M. Schmidt. Application of a neutral community  
456 model to assess structuring of the human lung microbiome. *mBio*, 6(1):e02284–14, jan 2015.  
457 doi: 10.1128/mbio.02284-14. URL <https://doi.org/10.1128%2Fmbio.02284-14>.
- 458 [16] Leopoldo N Segal, Alexander V Alekseyenko, Jose C Clemente, Rohan Kulkarni, Benjamin  
459 Wu, Hao Chen, Kenneth I Berger, Roberta M Goldring, William N Rom, Martin J Blaser, and  
460 Michael D Weiden. Enrichment of lung microbiome with supraglottic taxa is associated with  
461 increased pulmonary inflammation. *Microbiome*, 1(1):19, 2013. doi: 10.1186/2049-2618-1-19.  
462 URL <https://doi.org/10.1186%2F2049-2618-1-19>.
- 463 [17] John R. Erb-Downward, Deborah L. Thompson, Meilan K. Han, Christine M. Freeman, Lisa  
464 McCloskey, Lindsay A. Schmidt, Vincent B. Young, Galen B. Toews, Jeffrey L. Curtis, Baskaran  
465 Sundaram, Fernando J. Martinez, and Gary B. Huffnagle. Analysis of the lung microbiome in  
466 the “healthy” smoker and in COPD. *PLoS ONE*, 6(2):e16384, feb 2011. doi: 10.1371/journal.  
467 pone.0016384. URL <https://doi.org/10.1371%2Fjournal.pone.0016384>.

- 468 [18] Alison Morris, James M. Beck, Patrick D. Schloss, Thomas B. Campbell, Kristina Crothers,  
469 Jeffrey L. Curtis, Sonia C. Flores, Andrew P. Fontenot, Elodie Ghedin, Laurence Huang, Kath-  
470 leen Jablonski, Eric Kleerup, Susan V. Lynch, Erica Sodergren, Homer Twigg, Vincent B.  
471 Young, Christine M. Bassis, Arvind Venkataraman, Thomas M. Schmidt, and George M. We-  
472 instock. Comparison of the respiratory microbiome in healthy nonsmokers and smokers. *Ameri-  
473 can Journal of Respiratory and Critical Care Medicine*, 187(10):1067–1075, may 2013. doi:  
474 10.1164/rccm.201210-1913oc. URL <https://doi.org/10.1164/rccm.201210-1913oc>.
- 475 [19] Hutsaya Tantipong, Chantana Morkhareonpong, Songyod Jaiyindee, and Visanu Thamlikitkul.  
476 Randomized controlled trial and meta-analysis of oral decontamination with 2% chlorhexidine  
477 solution for the prevention of ventilator-associated pneumonia. *Infection Control & Hospital  
478 Epidemiology*, 29(02):131–136, feb 2008. doi: 10.1086/526438. URL [https://doi.org/10.  
479 1086/526438](https://doi.org/10.1086/526438).
- 480 [20] Mirelle Koeman, Andre J. A. M. van der Ven, Eelko Hak, Hans C. A. Joore, Karin Kaas-  
481 jager, Annemarie G. A. de Smet, Graham Ramsay, Tom P. J. Dormans, Leon P. H. J.  
482 Aarts, Ernst E. de Bel, Willem N. M. Hustinx, Ingeborg van der Tweel, Andy M. Hoe-  
483 pelman, and Marc J. M. Bonten. Oral decontamination with chlorhexidine reduces the  
484 incidence of ventilator-associated pneumonia. *American Journal of Respiratory and Criti-  
485 cal Care Medicine*, 173(12):1348–1355, jun 2006. doi: 10.1164/rccm.200505-820oc. URL  
486 <https://doi.org/10.1164/rccm.200505-820oc>.
- 487 [21] Hong bo Hu, Han ju Huang, Qiao ying Peng, Jia Lu, and Xing yun Lei. Prospective study  
488 of colonization and infection because of pseudomonas aeruginosa in mechanically ventilated  
489 patients at a neonatal intensive care unit in china. *American Journal of Infection Control*, 38  
490 (9):746–750, nov 2010. doi: 10.1016/j.ajic.2010.02.012. URL [https://doi.org/10.1016/j.  
491 ajic.2010.02.012](https://doi.org/10.1016/j.ajic.2010.02.012).
- 492 [22] Leopoldo N. Segal, Jose C. Clemente, Jun-Chieh J. Tsay, Sergei B. Koralov, Brian C. Keller,  
493 Benjamin G. Wu, Yonghua Li, Nan Shen, Elodie Ghedin, Alison Morris, Phillip Diaz, Laurence  
494 Huang, William R. Wikoff, Carles Ubeda, Alejandro Artacho, William N. Rom, Daniel H.  
495 Serman, Ronald G. Collman, Martin J. Blaser, and Michael D. Weiden. Enrichment of the  
496 lung microbiome with oral taxa is associated with lung inflammation of a th17 phenotype.  
497 *Nature Microbiology*, 1(5), apr 2016. doi: 10.1038/nmicrobiol.2016.31. URL [https://doi.  
498 org/10.1038/nmicrobiol.2016.31](https://doi.org/10.1038/nmicrobiol.2016.31).
- 499 [23] Rachel Rosen and Samuel Nurko. The importance of multichannel intraluminal impedance  
500 in the evaluation of children with persistent respiratory symptoms. *The American Journal of  
501 Gastroenterology*, 99(12):2452–2458, dec 2004. doi: 10.1111/j.1572-0241.2004.40268.x. URL  
502 <https://doi.org/10.1111/j.1572-0241.2004.40268.x>.
- 503 [24] Qiong Wang, George M Garrity, James M Tiedje, and James R Cole. Naive bayesian classifier for  
504 rapid assignment of rrna sequences into the new bacterial taxonomy. *Applied and environmental  
505 microbiology*, 73(16):5261–5267, 2007.

- 506 [25] D.M. Endres and J.E. Schindelin. A new metric for probability distributions. *IEEE Transactions*  
507 *on Information Theory*, 49(7):1858–1860, jul 2003. doi: 10.1109/tit.2003.813506. URL <https://doi.org/10.1109/tit.2003.813506>.  
508
- 509 [26] Sarah P. Preheim, Allison R. Perrotta, Jonathan Friedman, Chris Smilie, Ilana Brito, Mark B.  
510 Smith, and Eric Alm. Computational methods for high-throughput comparative analy-  
511 ses of natural microbial communities. In *Methods in Enzymology*, pages 353–370. Else-  
512 vier, 2013. doi: 10.1016/b978-0-12-407863-5.00018-6. URL [https://doi.org/10.1016/](https://doi.org/10.1016/b978-0-12-407863-5.00018-6)  
513 [b978-0-12-407863-5.00018-6](https://doi.org/10.1016/b978-0-12-407863-5.00018-6).
- 514 [27] P. Gajer, R. M. Brotman, G. Bai, J. Sakamoto, U. M. E. Schutte, X. Zhong, S. S. K. Koenig,  
515 L. Fu, Z. Ma, X. Zhou, Z. Abdo, L. J. Forney, and J. Ravel. Temporal dynamics of the human  
516 vaginal microbiota. *Science Translational Medicine*, 4(132):132ra52–132ra52, may 2012. doi:  
517 10.1126/scitranslmed.3003605. URL <https://doi.org/10.1126/scitranslmed.3003605>.
- 518 [28] Anna Heintz-Buschart, Patrick May, Cédric C. Laczny, Laura A. Lebrun, Camille Bellora,  
519 Abhimanyu Krishna, Linda Wampach, Jochen G. Schneider, Angela Hogan, Carine de Beaufort,  
520 and Paul Wilmes. Integrated multi-omics of the human gut microbiome in a case study of  
521 familial type 1 diabetes. *Nature Microbiology*, 2(1), oct 2016. doi: 10.1038/nmicrobiol.2016.180.  
522 URL <https://doi.org/10.1038/nmicrobiol.2016.180>.
- 523 [29] Eric Jones, Travis Oliphant, Pearu Peterson, et al. SciPy: Open source scientific tools for  
524 Python, 2001–. URL <http://www.scipy.org/>.
- 525 [30] F. Pedregosa, G. Varoquaux, A. Gramfort, V. Michel, B. Thirion, O. Grisel, M. Blondel, P. Pret-  
526 tenhofer, R. Weiss, V. Dubourg, J. Vanderplas, A. Passos, D. Cournapeau, M. Brucher, M. Per-  
527 rot, and E. Duchesnay. Scikit-learn: Machine learning in Python. *Journal of Machine Learning*  
528 *Research*, 12:2825–2830, 2011.
- 529 [31] E. K. Costello, C. L. Lauber, M. Hamady, N. Fierer, J. I. Gordon, and R. Knight. Bacterial  
530 community variation in human body habitats across space and time. *Science*, 326(5960):1694–  
531 1697, nov 2009. doi: 10.1126/science.1177486. URL [https://doi.org/10.1126/science.](https://doi.org/10.1126/science.1177486)  
532 [1177486](https://doi.org/10.1126/science.1177486).
- 533 [32] Curtis Huttenhower, Dirk Gevers, Rob Knight, Sahar Abubucker, Jonathan H. Badger, Asif T.  
534 Chinwalla, Heather H. Creasy, Ashlee M. Earl, Michael G. FitzGerald, Robert S. Fulton,  
535 Michelle G. Giglio, Kymberlie Hallsworth-Pepin, Elizabeth A. Lobos, Ramana Madupu, Vincent  
536 Magrini, John C. Martin, Makedonka Mitreva, Donna M. Muzny, Erica J. Sodergren, James  
537 Versalovic, Aye M. Wollam, Kim C. Worley, Jennifer R. Wortman, Sarah K. Young, Qiandong  
538 Zeng, Kjersti M. Aagaard, Olukemi O. Abolude, Emma Allen-Vercoe, Eric J. Alm, Lucia Al-  
539 varado, Gary L. Andersen, Scott Anderson, Elizabeth Appelbaum, Harindra M. Arachchi, Gary  
540 Armitage, Cesar A. Arze, Tulin Ayvaz, Carl C. Baker, Lisa Begg, Tsegahiwot Belachew, Veena  
541 Bhonagiri, Monika Bihan, Martin J. Blaser, Toby Bloom, Vivien Bonazzi, J. Paul Brooks, Gre-  
542 gory A. Buck, Christian J. Buhay, Dana A. Busam, Joseph L. Campbell, Shane R. Canon,  
543 Brandi L. Cantarel, Patrick S. G. Chain, I-Min A. Chen, Lei Chen, Shaila Chhibba, Ken

544 Chu, Dawn M. Ciulla, Jose C. Clemente, Sandra W. Clifton, Sean Conlan, Jonathan Crab-  
545 tree, Mary A. Cutting, Noam J. Davidovics, Catherine C. Davis, Todd Z. DeSantis, Carolyn  
546 Deal, Kimberley D. Delehaunty, Floyd E. Dewhirst, Elena Deych, Yan Ding, David J. Dool-  
547 ing, Shannon P. Dugan, Wm Michael Dunne, A. Scott Durkin, Robert C. Edgar, Rachel L.  
548 Erlich, Candace N. Farmer, Ruth M. Farrell, Karoline Faust, Michael Feldgarden, Victor M.  
549 Felix, Sheila Fisher, Anthony A. Fodor, Larry J. Forney, Leslie Foster, Valentina Di Francesco,  
550 Jonathan Friedman, Dennis C. Friedrich, Catrina C. Fronick, Lucinda L. Fulton, Hongyu Gao,  
551 Nathalia Garcia, Georgia Giannoukos, Christina Giblin, Maria Y. Giovanni, Jonathan M. Gold-  
552 berg, Johannes Goll, Antonio Gonzalez, Allison Griggs, Sharvari Gujja, Susan Kinder Haake,  
553 Brian J. Haas, Holli A. Hamilton, Emily L. Harris, Theresa A. Hepburn, Brandi Herter, Di-  
554 ane E. Hoffmann, Michael E. Holder, Clinton Howarth, Katherine H. Huang, Susan M. Huse,  
555 Jacques Izard, Janet K. Jansson, Huaiyang Jiang, Catherine Jordan, Vandita Joshi, James A.  
556 Katancik, Wendy A. Keitel, Scott T. Kelley, Cristyn Kells, Nicholas B. King, Dan Knights,  
557 Heidi H. Kong, Omry Koren, Sergey Koren, Karthik C. Kota, Christie L. Kovar, Nikos C.  
558 Kyrpides, Patricio S. La Rosa, Sandra L. Lee, Katherine P. Lemon, Niall Lennon, Cecil M.  
559 Lewis, Lora Lewis, Ruth E. Ley, Kelvin Li, Konstantinos Liolios, Bo Liu, Yue Liu, Chien-Chi  
560 Lo, Catherine A. Lozupone, R. Dwayne Lunsford, Tessa Madden, Anup A. Mahurkar, Peter J.  
561 Mannon, Elaine R. Mardis, Victor M. Markowitz, Konstantinos Mavromatis, Jamison M. Mc-  
562 Corrison, Daniel McDonald, Jean McEwen, Amy L. McGuire, Pamela McInnes, Teena Mehta,  
563 Kathie A. Mihindukulasuriya, Jason R. Miller, Patrick J. Minx, Irene Newsham, Chad Nus-  
564 baum, Michelle O’Laughlin, Joshua Orvis, Ioanna Pagani, Krishna Palaniappan, Shital M.  
565 Patel, Matthew Pearson, Jane Peterson, Mircea Podar, Craig Pohl, Katherine S. Pollard, Mihai  
566 Pop, Margaret E. Priest, Lita M. Proctor, Xiang Qin, Jeroen Raes, Jacques Ravel, Jeffrey G.  
567 Reid, Mina Rho, Rosamond Rhodes, Kevin P. Riehle, Maria C. Rivera, Beltran Rodriguez-  
568 Mueller, Yu-Hui Rogers, Matthew C. Ross, Carsten Russ, Ravi K. Sanka, Pamela Sankar, J. Fah  
569 Sathirapongsasuti, Jeffery A. Schloss, Patrick D. Schloss, Thomas M. Schmidt, Matthew Scholz,  
570 Lynn Schriml, Alyxandria M. Schubert, Nicola Segata, Julia A. Segre, William D. Shannon,  
571 Richard R. Sharp, Thomas J. Sharpton, Narmada Shenoy, Nihar U. Sheth, Gina A. Simone, In-  
572 dresh Singh, Christopher S. Smillie, Jack D. Sobel, Daniel D. Sommer, Paul Spicer, Granger G.  
573 Sutton, Sean M. Sykes, Diana G. Tabbaa, Mathangi Thiagarajan, Chad M. Tomlinson, Man-  
574 lito Torralba, Todd J. Treangen, Rebecca M. Truty, Tatiana A. Vishnivetskaya, Jason Walker,  
575 Lu Wang, Zhengyuan Wang, Doyle V. Ward, Wesley Warren, Mark A. Watson, Christopher  
576 Wellington, Kris A. Wetterstrand, James R. White, Katarzyna Wilczek-Boney, YuanQing Wu,  
577 Kristine M. Wylie, Todd Wylie, Chandri Yandava, Liang Ye, Yuzhen Ye, Shibu Yooseph, Bon-  
578 nie P. Youmans, Lan Zhang, Yanjiao Zhou, Yiming Zhu, Laurie Zoloth, Jeremy D. Zucker,  
579 Bruce W. Birren, Richard A. Gibbs, Sarah K. Highlander, Barbara A. Methé, Karen E. Nelson,  
580 Joseph F. Petrosino, George M. Weinstock, Richard K. Wilson, and Owen White. Structure,  
581 function and diversity of the healthy human microbiome. *Nature*, 486(7402):207–214, jun 2012.  
582 doi: 10.1038/nature11234. URL <https://doi.org/10.1038/nature11234>.

583 [33] C. A. Lozupone, J. Stombaugh, A. Gonzalez, G. Ackermann, D. Wendel, Y. Vazquez-Baeza,  
584 J. K. Jansson, J. I. Gordon, and R. Knight. Meta-analyses of studies of the human microbiota.

- 585 *Genome Research*, 23(10):1704–1714, jul 2013. doi: 10.1101/gr.151803.112. URL [https://](https://doi.org/10.1101/gr.151803.112)  
586 [doi.org/10.1101/gr.151803.112](https://doi.org/10.1101/gr.151803.112).
- 587 [34] Tom Fawcett. An introduction to ROC analysis. *Pattern Recognition Letters*, 27(8):861–874, jun  
588 2006. doi: 10.1016/j.patrec.2005.10.010. URL [https://doi.org/10.1016/j.patrec.2005.](https://doi.org/10.1016/j.patrec.2005.10.010)  
589 [10.010](https://doi.org/10.1016/j.patrec.2005.10.010).
- 590 [35] Kelly Weir, Sandra McMahon, Linda Barry, Robert Ware, I Brent Masters, and Anne B.  
591 Chang. Oropharyngeal aspiration and pneumonia in children. *Pediatric Pulmonology*, 42(11):  
592 1024–1031, 2007. doi: 10.1002/ppul.20687. URL <https://doi.org/10.1002/ppul.20687>.
- 593 [36] O. Ortega, O. Sakwinska, S. Combremont, B. Berger, J. Sauser, C. Parra, S. Zarcero, J. Nart,  
594 S. Carrión, and P. Clavé. High prevalence of colonization of oral cavity by respiratory pathogens  
595 in frail older patients with oropharyngeal dysphagia. *Neurogastroenterology & Motility*, 27(12):  
596 1804–1816, sep 2015. doi: 10.1111/nmo.12690. URL <https://doi.org/10.1111/nmo.12690>.
- 597 [37] Kentaro Akata, Kazuhiro Yatera, Kei Yamasaki, Toshinori Kawanami, Keisuke Naito, Shingo  
598 Noguchi, Kazumasa Fukuda, Hiroshi Ishimoto, Hatsumi Taniguchi, and Hiroshi Mukae. The  
599 significance of oral streptococci in patients with pneumonia with risk factors for aspiration:  
600 the bacterial floral analysis of 16s ribosomal RNA gene using bronchoalveolar lavage fluid.  
601 *BMC Pulmonary Medicine*, 16(1), may 2016. doi: 10.1186/s12890-016-0235-z. URL [https:](https://doi.org/10.1186/s12890-016-0235-z)  
602 [//doi.org/10.1186/s12890-016-0235-z](https://doi.org/10.1186/s12890-016-0235-z).
- 603 [38] Shinya Kageyama, Toru Takeshita, Michiko Furuta, Mikiko Tomioka, Mikari Asakawa, Shino  
604 Suma, Kenji Takeuchi, Yukie Shibata, Yasuyuki Iwasa, and Yoshihisa Yamashita. Relationships  
605 of variations in the tongue microbiota and pneumonia mortality in nursing home residents.  
606 *The Journals of Gerontology: Series A*, oct 2017. doi: 10.1093/gerona/glx205. URL [https:](https://doi.org/10.1093/gerona/glx205)  
607 [//doi.org/10.1093/gerona/glx205](https://doi.org/10.1093/gerona/glx205).

## 1 Figures

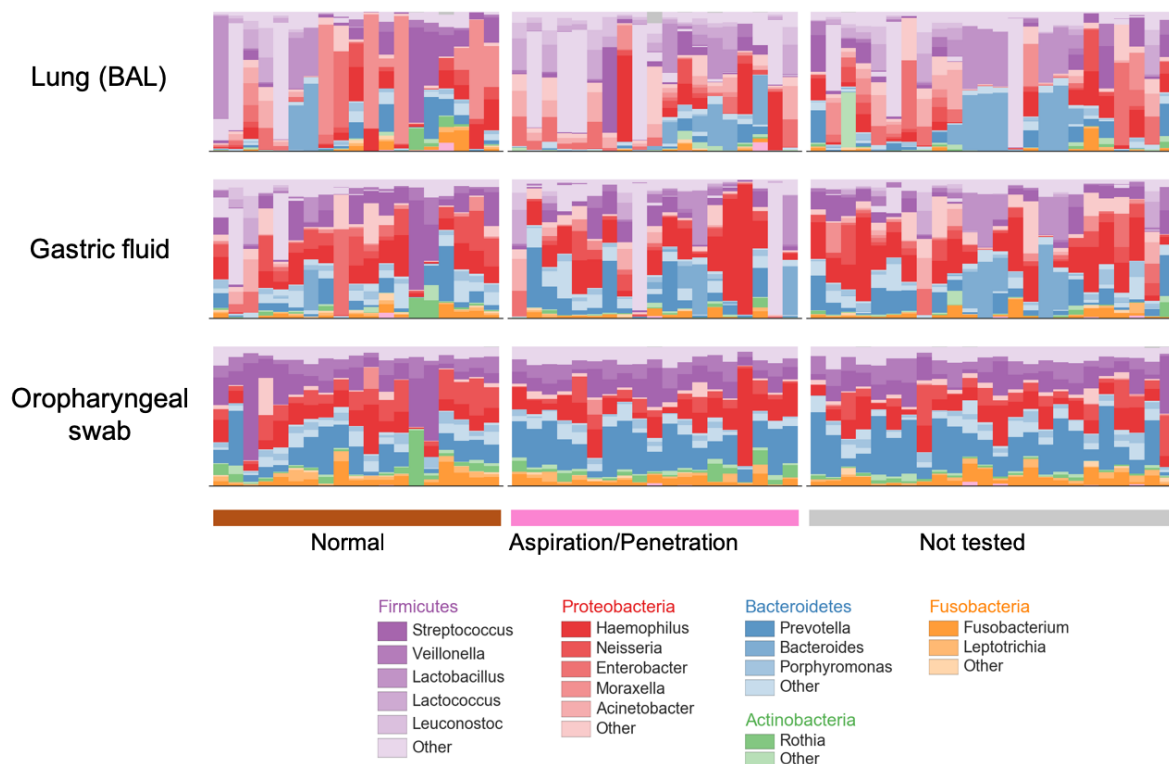

Figure 1: **Aerodigestive communities have similar predominant genera.** Bar plots showing relative abundances of aerodigestive microbiomes collapsed to the genus level for the 66 patients with all sequencing data from all three aerodigestive sites. Each column corresponds to one patient who had all three aerodigestive sites sequenced (N = 19 non-aspirators, 23 aspirators, 24 untested). Phyla in legend are those with mean abundance > 0.01 across all patients. Any other phyla are colored gray.



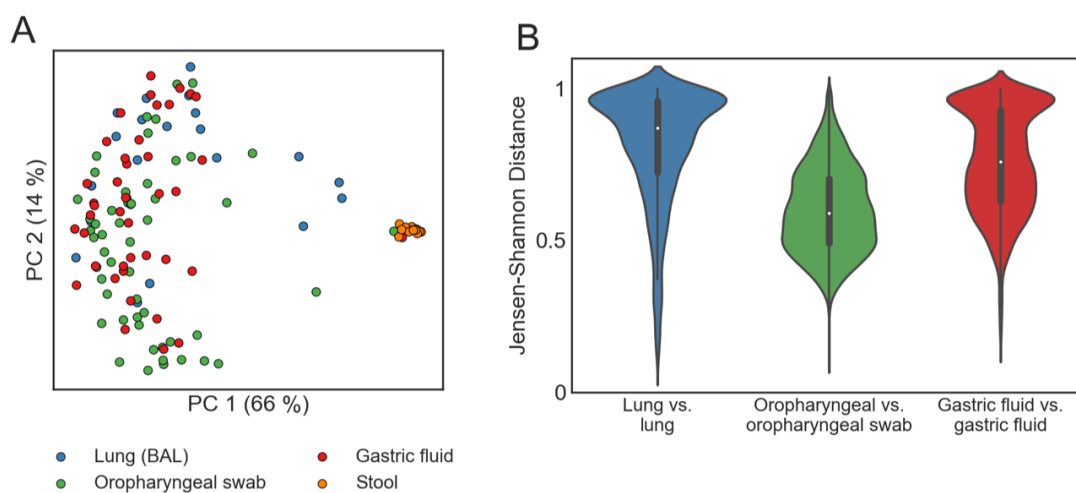

**Figure 2: Lung and gastric communities are more variable across people than oropharyngeal communities.** (A) PCoA plot of aerodigestive and stool microbial communities for all patients in the one sequencing batch ( $N = 21$  BAL, 52 oropharyngeal swab, 43 gastric fluid, and 14 stool samples). The PCoA plot of the samples in the other sequencing batch are included in Supplementary Figure 1. (B) Violin plots of the Jensen-Shannon distance (JSD) between samples from the same site across different patients. A JSD close to 1 indicates that communities are very different (less similar). Supplementary Figures 4 and 5 show these results with the Bray Curtis distance metric instead of JSD.

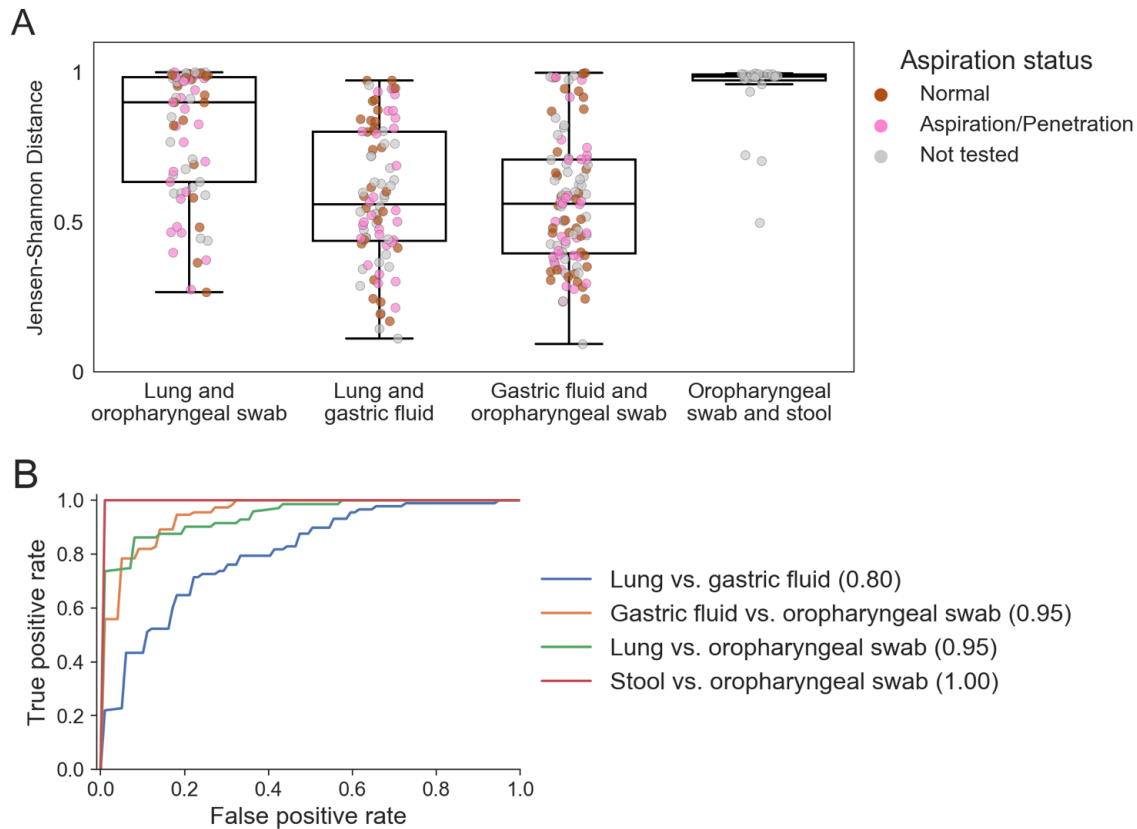

**Figure 3: Within patients, aerodigestive communities are similar but lung and oropharynx remain most distinct.** (A) Jensen-Shannon distances between samples from different sites from the same patient. Comparisons between stool and oropharynx are included to contextualize these results, as these are expected to be very different. All comparisons are significant (Wilcoxon rank sums test calculated with Python's `scipy.stats.ranksums` function) except the lung and gastric fluid vs. gastric fluid and oropharyngeal swab beta diversities ( $p = 0.6$ ). Lung and oropharyngeal vs. oropharyngeal and stool,  $p = 0.005$ . All other comparisons:  $p < 1 \times 10^{-8}$ . (B) ROC curve of classifiers distinguishing different aerodigestive sites. Mean areas under the ROC curve (AUCs) are reported in parentheses in the legend.

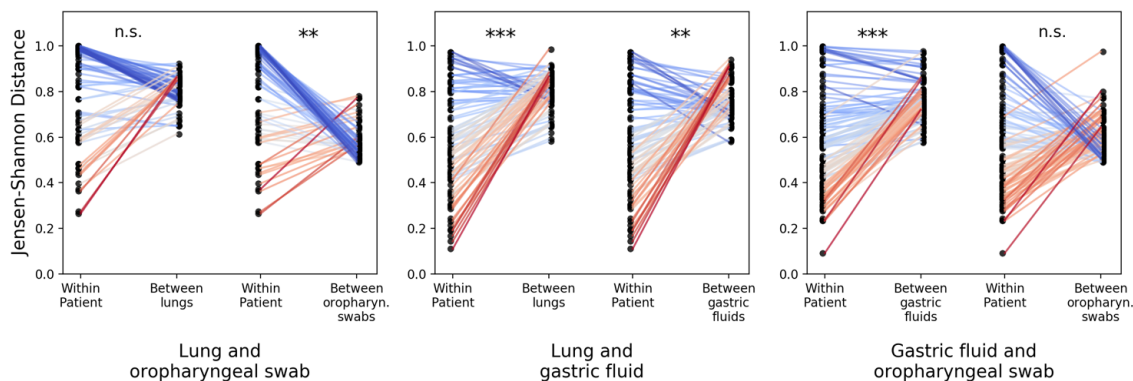

**Figure 4: Lung and gastric microbial communities are driven primarily by person rather than body site.** We compared the within-patient JSD for all pairs of aerodigestive sites with the average across-patient JSD between each of the sites in the within-patient comparison. Each panel shows different aerodigestive pairs; the two slope graphs correspond to different across-site comparisons; and each point corresponds to one patient. The left points in each slope graph show the within-patient JSD for the respective pair of sites for each patient (and are the same within each panel). The right points show the average JSD between the corresponding patient's site X and all other patients' site X. For example, the middle panel shows that the JSD between lung and gastric fluid communities within patients is lower than the average JSD between different lungs (left slope graph) and the average JSD between different gastric fluid samples (right slope graph). P values were calculated with a Wilcoxon signed-rank p-values using Python's `scipy.stats.wilcoxon` function. \*\*\* :  $p < 10^{-10}$ ; \*\* :  $10^{-10} < p < 10^{-7}$ , table of comparisons and p-values can be found in Supplementary Table 3.

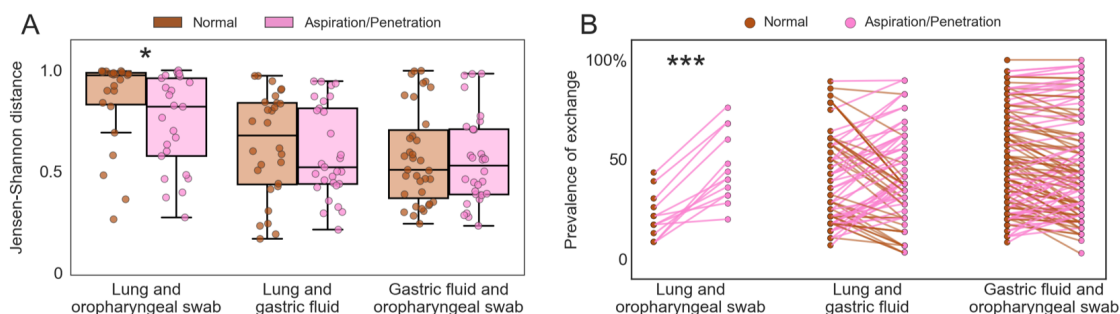

**Figure 5: Dysphagia increases aspiration of microbes from the oropharynx but not the stomach** (A) Intra-patient Jensen Shannon distance for different aerodigestive site comparisons in non-aspirators (brown) and aspirators (pink). Each point represents one patient. P-values (Wilcoxon rank sums test, calculated with Python's `scipy.stats.ranksums` function): lung and oropharyngeal swab  $p = 0.04$ , lung and gastric fluid  $p = 0.5$ , gastric fluid and oropharyngeal swab  $p = 0.8$ . (B) Percentage of patients with the previously defined exchanged microbes present in both of the respective sites (x-axis) in non-aspirators (brown) and aspirators (pink). Each pair of points represents one exchanged OTU. P-values (paired t-test on  $\log_{10}$  prevalence values, calculated with Python's `scipy.stats.ttest_rel` function: lung and oropharyngeal swab  $p = 4 \times 10^{-5}$ , lung and gastric fluid  $p = 0.5$ , gastric fluid and oropharyngeal swab  $p = 0.1$ .

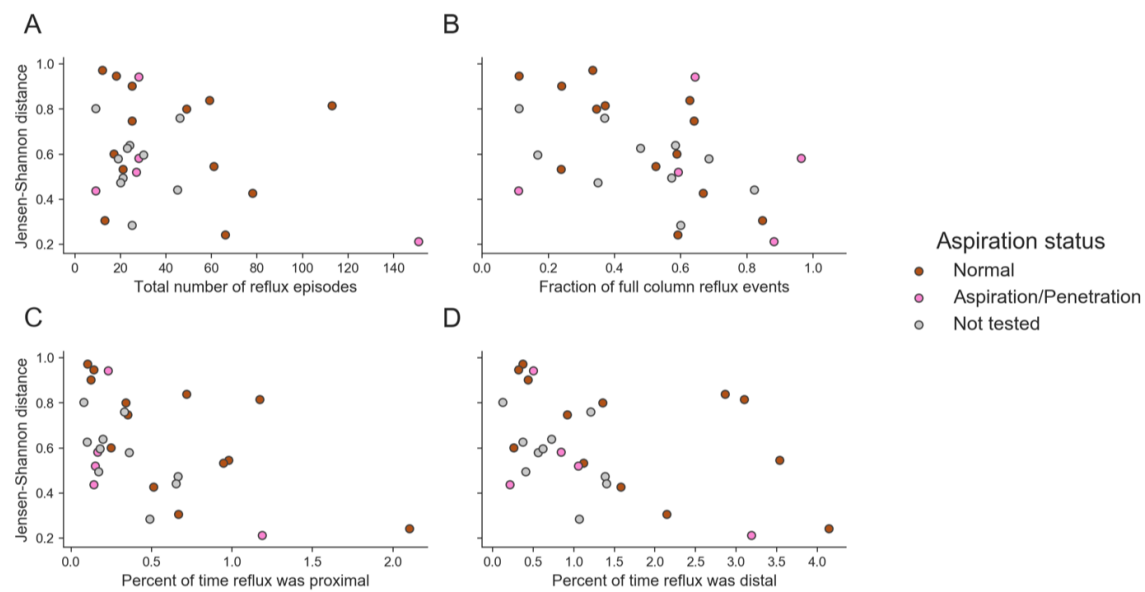

Figure 6: **Reflux severity may correlate with the similarity between lung and gastric communities.** Each plot shows the correlation between different reflux measures and the within-patient Jensen-Shannon distance between BAL and gastric fluid samples. Points are colored according to aspiration status. All reflux measures include both acid- and non-acid reflux. Spearman correlation and p-values: total number of reflux episodes  $\rho_s = -0.25, p = 0.2$ , percentage of full column reflux events  $\rho_s = -0.40, p = 0.04$ , percent of time reflux was proximal  $\rho_s = -0.55, p = 0.002$ , percent of time reflux was distal  $\rho_s = -0.45, p = 0.02$ .
